# 1 **Longitudinal single-cell transcriptomics reveals distinct patterns of** 2 **recurrence in acute myeloid leukemia**

3 Yanan Zhai<sup>1,2,3</sup>, Prashant Singh<sup>2</sup>, Anna Dolnik<sup>4,5</sup>, Peter Brazda<sup>2,3</sup>, Nader Atlasy<sup>3</sup>, Nunzio del  
4 Gaudio<sup>1</sup>, Konstanze Döhner<sup>6</sup>, Hartmut Döhner<sup>6</sup>, Saverio Minucci<sup>7</sup>, Joost Martens<sup>3</sup>, Lucia  
5 Altucci<sup>1,8,\*</sup>, Wout Megchelenbrink<sup>1,2,\*</sup>, Lars Bullinger<sup>4,5,\*</sup>, Hendrik G. Stunnenberg<sup>2,3,\*,#</sup>

6  
7 <sup>1</sup>Department of Precision Medicine, University of Campania “Luigi Vanvitelli”, Vico L. De  
8 Crecchio 7, 80138 Naples, Italy; <sup>2</sup>Prinses Maxima Centrum, Heidelberglaan 25, 3584 CS  
9 Utrecht, The Netherlands; <sup>3</sup>Department of Molecular Biology, Faculty of Science, Radboud  
10 University, Radboud Institute for Molecular Life Sciences, Nijmegen, the Netherlands;  
11 <sup>4</sup>Charité – Universitätsmedizin Berlin, corporate member of Freie Universität Berlin,  
12 Humboldt-Universität zu Berlin, and Berlin Institute of Health, Medical Department,  
13 Division of Hematology, Oncology, and Cancer Immunology, Berlin, Germany; <sup>5</sup>German  
14 Cancer Consortium (DKTK) and German Cancer Research Center (DKFZ), Heidelberg,  
15 Germany; <sup>6</sup>Department of Internal Medicine III, University Hospital of Ulm, Ulm, Germany;  
16 <sup>7</sup>Department of Experimental Oncology, European Institute of Oncology, Milan, Italy;  
17 <sup>8</sup>BIOGEM, Institute of Molecular Biology and Genetics, Ariano Irpino (AV), Italy.

18  
19 \* Senior authors

20  
21 # Corresponding author:

22 Hendrik G. Stunnenberg, Department of Molecular Biology, Faculty of Science, Radboud  
23 University, Radboud Institute for Molecular Life Sciences, Nijmegen, the Netherlands,  
24 Geert Grooteplein Zuid 28, 6525 GA Nijmegen, The Netherlands.  
25 Phone: +31654312535 E-mail: H.Stunnenberg@ncmls.ru.nl

## 26 27 **Competing interests**

28 The authors declare no competing interests.

29 **Abstract**

30 The heterogeneity and evolution of AML blasts can render therapeutic interventions  
31 ineffective in a yet poorly understood patient-specific manner. To gain insight into the  
32 clonal heterogeneity of diagnosis (Dx) and relapse (Re) pairs, we employed whole-exome  
33 sequencing and single-cell RNA-seq to longitudinally profile two t(8;21) (*AML1-ETO* =  
34 *RUNX1-RUNX1T1*), and four *FLT3*-ITD AML cases.

35 The single cell RNA data underpinned the tumor heterogeneity amongst patient blasts. The  
36 Dx-Re transcriptomes of high risk *FLT3*-ITD pairs formed a continuum from extensively  
37 changed in the absence of significantly mutational changes in AML-associated genes to  
38 rather similar Dx-Re pair of an intermediate risk *FLT3*-ITD. In one high risk *FLT3*-ITD pair, a  
39 pathway switched from an AP-1 regulated network in Dx to mTOR signaling in Re. The  
40 distinct *AML1-ETO* pairs comprise clusters that share genes related to hematopoietic stem  
41 cell maintenance and cell migration suggesting that the Re leukemic stem cell-like (LSC-  
42 like) cells probably evolved from the Dx LSC-like cells.

43 In summary, our study revealed a continuum from drastic transcriptional changes to  
44 extensive similarities between respective Dx-Re pairs that are poorly explained by the well-  
45 established model of clonal evolution. Our results suggest alternative and currently  
46 unappreciated and unexplored mechanisms leading to therapeutic resistance and AML  
47 recurrence.

## 48 Introduction

49 Acute myeloid leukemia (AML) is a malignancy of hematopoietic stem cells or early  
50 progenitors resulting from the accumulation of genetic aberrations that disturb key  
51 biological processes. Mutations may occur in myeloid progenitor populations, which confer  
52 self-renewal capacity to the progenitors<sup>1</sup>. In the past decades, numerous AML associated  
53 gene alterations have been identified that can be broadly grouped into four classes<sup>2</sup>. Class  
54 I comprises the mutations that activate signal transduction pathways and induce the  
55 proliferation or survival of HSPCs, such as *FLT3*<sup>3,4</sup>, *NRAS/KRAS*<sup>5</sup> and *KIT*<sup>6</sup>. Class II consists of  
56 mutations or fusions in genes coding for transcription factors that are required for  
57 hematopoietic maturation, like *AML1-ETO (RUNX1-RUNX1T1)*<sup>7</sup> and *CEBPA*<sup>8</sup>. Class II  
58 aberrations happen during early hematopoiesis and initiate leukemia, while Class I  
59 aberrations take place in later stages and cause leukemia expansion. Class III consists of  
60 epigenetic regulators like *IDH1/2*, *TET2*, *DNMT3A* and *ASXL1*, whereas class IV consists of  
61 tumor suppressor genes, such as *TP53*.

62 Despite that current chemotherapies efficiently induce complete remission, AML patients  
63 frequently suffer from relapse and have low overall 5-years survival rates<sup>9-11</sup>. Recurrence  
64 can emerge as a result of the expansion of pre-existing chemo-resistant subpopulations or  
65 by acquiring novel chemo-resistant subpopulations due to genomic alterations<sup>12</sup>. The  
66 advent of single-cell RNA sequencing provides revolutionary opportunities to assess the  
67 heterogeneity of cancer populations at the single-cell level and explore the transcriptional  
68 features of individual cell types, such as subpopulations contributing to the relapse.  
69 However, few longitudinal studies<sup>13,14</sup> focused on analyzing pair-wise samples from AML  
70 patients, at first diagnosis and relapse.

71 Here, we applied single-cell RNA sequencing to analyze dynamic changes of gene  
72 expression between AML samples at diagnosis and at relapse. We profiled 5 612 high-  
73 quality cells at diagnosis and relapse from 6 AML patients, n=2 low risk cases with t(8;21)  
74 (*AML1-ETO*), n=1 intermediate and n=3 high risk AML cases with *FLT3*-ITD. Whole-exome  
75 sequencing (WES) was used to study the acquired genomic mutational profile. Our single  
76 cell RNA study uncovered extensive inter- and intra-heterogeneity amongst *AML1-ETO* and  
77 *FLT3*-ITD pairs at diagnosis (Dx) and relapse (Re). Our study provides novel insights into  
78 recurrence and unveils vulnerabilities that could serve as new entry points for targeting  
79 relapse AMLs.

## 80 **Methods**

81

### 82 **AML samples and cell preparation**

83 We processed 6 paired Dx-Re bone marrow aspirates from adult AML patients, with *AML1-*  
84 *ETO* (n=2 low risk cases) or *FLT3-ITD* (n=1 intermediate and n=3 high risk). Patients  
85 characteristics are summarized in Supplemental Table 1. CD33/CD34+ cells were sorted  
86 into 384-well plates and stored at -80°C.

87

### 88 **Single cell SORT-seq**

89 SORT-seq<sup>15</sup> is based on the integration of single cell FACS sorting (Fluorescence-Activated  
90 Cell Sorter) with the CEL-Seq2 protocol<sup>16</sup>. Single cell libraries were paired-end sequenced  
91 on an Illumina NextSeq500 at an average depth of ~30M reads per library.

92

### 93 **Fusion genes detection**

94 To quantify the reads per gene and detect fusion genes from bulk RNA-Seq, sequence  
95 libraries were aligned to Gencode v37 reference genome version hg38 using STAR-Fusion  
96 v1.10.0<sup>17</sup> in 2-pass mode, with parameters `--CPU 12 --FusionInspector validate --`  
97 `examine_coding_effect --denovo_reconstruct`.

98

### 99 **Whole-exome sequencing**

100 WES libraries were generated as previously described<sup>18</sup>. Diagnosis and relapse samples  
101 were compared with samples collected at CR (Complete Remission).

102

### 103 **Pseudo-time trajectory analysis**

104 We used Monocle3<sup>19,20</sup> for pseudo-time analysis with default parameters, to assess the  
105 trajectories within the pairs. We used the DEGs obtained from Seurat 3.0<sup>19</sup> to plot the  
106 dynamic changes of gene expression along the trajectories.

107

### 108 **Definition of leukemic stem cells and cycling genes**



109 The 17-gene leukemic stem cell (LSC17) score was calculated based on the equation by Ng  
110 et al.<sup>21</sup>. Cell cycle phase scores were calculated using Seurat 3.0 function *CellCycleScoring*  
111 with default parameters.

112

## 113 Results

114

### 115 Whole exome- and gene fusion analysis points to limited clonal rearrangements between 116 Dx and Re

117 Clonal expansion and evolution is a major determinant of AML relapse<sup>22</sup>. To identify the  
118 genomic landscape at Dx and Re, we performed whole exome sequencing analysis (WES)  
119 and gene fusion detection based on bulk RNA-sequencing. We detected 4 up to 26 somatic  
120 mutations in the Dx and Re pairs (Figure 1A, Supplemental Table 2). This analysis confirmed  
121 the presence of an inframe insertion in the juxtamembrane domain (JMD) between amino  
122 acid 583 and 611 in all four patients diagnosed with *FLT3*-ITD as well as *AML1-ETO* fusion  
123 transcripts in the *AML1-ETO* patients (Figure 1A-B, Supplemental Table 2). Other AML-  
124 associated somatic variants, such as *NPM1*, *WT1*, *CEBPA*, *IDH1*, *NRAS* and *DNMT3A* were  
125 detected for the *FLT3*-ITD patients, often in a patient-specific manner. For both *AML1-ETO*  
126 patients, the WES analysis revealed a *KIT* mutation that is associated with poorer prognosis  
127 and increased risk of relapse<sup>23,24,25</sup>.

128 Next, to identify clonal rearrangements that may have led to disease relapse, we screened  
129 for somatic mutations with a significantly altered variant allele frequency (VAF) between  
130 Dx and Re (VAF  $\geq$  0.2 and  $p < 0.05$ , Fisher's exact test; methods). For patient s232, WES and  
131 PCR analysis revealed two distinct *FLT*-ITD mutations in Dx sample, one of which one was  
132 lost at Re ( $p=1.0 \times 10^{-3}$ ; Fisher's exact test; Figure 1A, Supplemental Table 2). WES analysis  
133 further revealed the presence of 4bp insertion in *NPM1* (mutation type A<sup>26</sup>) at Dx, that was  
134 decreased at Re ( $p=8.2 \times 10^{-3}$ ) as well as a lowly abundant missense mutation in the *NRAS*  
135 gene at Dx (VAF=0.087) that was not detected at Re (VAF=0;  $p=2.0 \times 10^{-4}$ ; Figure 1C). For  
136 patient s2275, the WES data showed considerably shorter tandem duplications at relapse  
137 compared to diagnosis ( $p = 4.6 \times 10^{-41}$ ), which were confirmed by PCR (Supplemental Table  
138 3) as well as the presence of *NUP98-NSD1* fusion transcripts at Dx and Re. We further  
139 detected a 4bp insertion in *NPM1* and a missense mutation in *DNMT3A* that are retained  
140 between Dx and Re in patient s292. For patient s3432, WES and PCR showed a retention of  
141 the *FLT3*-ITD, both in the insertion location and allelic ratio. Somatic mutations in *FAT3*  
142 (VAF= 0.238,  $p = 4.3 \times 10^{-8}$ ), *ITGB7* (VAF= 0.165,  $p = 1.32 \times 10^{-6}$ ), *UBA2* (VAF = 0.117,  $p=6.32$   
143  $\times 10^{-3}$ ) and *SLC4A3* (VAF = 0.135,  $p= 6.6 \times 10^{-3}$ ) were significantly gained in the Re sample  
144 (Figure 1C and Supplemental Table 2). Two distinct *KIT* mutations (VAF = 0.325; VAF =  
145 0.138, respectively) were detected in patient s914 at Dx, both of which were significantly

146 reduced at Re ( $p < 4.7 \times 10^{-7}$ ). Finally, other somatic mutations that have not been  
147 implicated with AML in the Catalogue of Somatic Mutations in Cancer<sup>27</sup> (COSMIC), were  
148 lost or gained in all pairs (Figure 1C; methods).

149 To summarize, we confirmed the presence of *FLT3*-ITDs and *AML1-ETO* in four and two  
150 patients respectively. Additional somatic aberrations in AML-associated genes were  
151 patient-specific. *FLT3*-ITD mutations were altered in two patients and in one patient, one  
152 of the two *FLT3*-ITD mutations was lost at Re. For patient s232, a *NPM1* mutation was  
153 detected at Dx, but lost at Re. Finally, we observed a significant reduction in two distinct  
154 *KIT* mutations in patient s914 between Dx and Re.

155

### 156 **Single cell transcriptomics reveals distinct AML-phenotypes at Dx and Re**

157 Next, to better understand the transcriptional phenotypes, their differences and possible  
158 mechanisms that led to disease progression, we profiled bone marrow cells obtained at Dx  
159 and after Re using single cell transcriptomics. In brief, single CD33<sup>+</sup> or CD34<sup>+</sup> bone marrow  
160 cells were FACS-sorted into 384-well plates following the SORT-seq method<sup>15</sup> we acquired  
161 5 612 single cell profiles, in which 4 129 unique transcripts from 1 678 genes were detected  
162 on average (Supplemental Figure 1A, methods).

163 After normalization, cells were clustered and visualized using the uniform manifold  
164 approximation and projection<sup>28</sup> (UMAP). *AML1-ETO* vs *FLT3*-ITD samples are separated by  
165 UMAP1 and Dx-Re pairs cluster relatively close together (Figure 2A-B). Nevertheless,  
166 considerable heterogeneity between and within pairs exists (Figure 2B). Strikingly, Dx-Re  
167 cells of *FLT3*-ITD patient s232 cluster in close proximity suggesting minor phenotypic and  
168 molecular alterations, eventhough this patient lost *NPM1* and *NRAS* mutation at Re. In  
169 contrast, Dx cells of patient s3432 are completely separated from Re cells, although one  
170 mutation in the *FAT3* gene was detected in Re (VAF=0.238) (Supplemental Table 2).  
171 Similarly, the Dx and Re cells of *AML1-ETO* patient s220 constitute distinct clusters, but  
172 only gained mutations in genes that are not associated with AML (Figure 1C).  
173 Unexpectedly, patient s914 had a significant loss of two *KIT* mutations between Dx  
174 (VAF=0.325 and 0.138) and Re (VAF= 0.097 and 0) that resulted in relatively small  
175 transcriptional alterations.

176 To further verify the quality of our single cell data, we looked for gene signatures that  
177 discriminated *AML1-ETO* or *FLT3*-ITD patients. These signatures include well-established  
178 *AML1-ETO* markers, like upregulation of the transcriptional co-repressor *RUNX1T1* (aka  
179 *ETO*), the transcription factor *POU4F1*<sup>29</sup> and the myeloid differentiation protein *MPO*<sup>30</sup>  
180 (Figure 2C, top). *FLT3*-ITD samples on the other hand are characterized by *VIM*, *ANXA1*,  
181 *MSI2*, *LAPTM5*. Other genes tend to be overexpressed only in a subset of the samples: *HLA*  
182 genes are overexpressed in *AML1-ETO* patient s220, but not in s914. In the *FLT3*-ITD

183 samples, *HOXA5* and *HOXB3* genes that are overexpressed in *NPM1*-mutated AML<sup>31</sup>,  
184 appear overexpressed in a patient-specific manner (Figure 2C, bottom). Closer inspection  
185 of these and other *NPM1*-marker genes showed that these genes are indeed significantly  
186 higher expressed in the *FLT3*-ITD samples with an additional *NPM1* mutation (*NPM1*<sup>mut</sup>)  
187 compared to *NPM1*<sup>WT</sup> samples (FC > 1.5 and p < 6.0 x 10<sup>-15</sup>; Figure 2D). Notably, *HOX*-genes  
188 are also highly expressed in *FLT3*-ITD patient s2275. In these samples, we detected a  
189 *NUP98-NSD1* fusion gene that is characterized by upregulation of *HOXA* and *HOXB* genes<sup>32</sup>  
190 (Figure 2D).

191 In summary, single cell transcriptomics showed distinct clustering of *AML1-ETO* vs *FLT3*-  
192 ITD patients. Differential analysis confirmed upregulation of well-established marker genes  
193 as well as elevated expression of *HOX* genes in *NPM1*<sup>mut</sup> and the *NUP98-NSD1* positive *FLT3*-  
194 ITD samples. On a global level, the transcriptional changes between Dx and Re are poorly  
195 explained by mutations in coding regions of AML-associated genes. To gain a deeper  
196 understanding of the mechanisms underlying these changes, we subsequently performed  
197 an indepth analysis of Dx-Re pairs per AML-subtype and in a patient-specific setting.

198

#### 199 **Dx-Re transcriptomic changes are patient specific**

200 Given this high intra- and inter-patient heterogeneity, we focused on the Dx-Re differences  
201 per patient in the remainder of this study. For this, we separated the UMAPs of the *FLT3*-  
202 ITD and *AML1-ETO* patients (Figure 3A-B) and computed the differentially expressed genes  
203 between the Dx-Re pairs per patient. This analysis reinforced the notion that the  
204 differences in transcription between Dx and Re are highly patient specific (Supplemental  
205 Figure 1B-C, Figure 3C-D).

206 The *FLT3*-ITD patients show a modest separation between the Dx and Re samples of patient  
207 s232 (Figure 3A). Cluster analysis revealed two clusters at diagnosis (cluster 1-2) and one  
208 at relapse (cluster 3, Supplemental Figure 2A). Re cells lost expression of members of the  
209 *AP-1* transcription factor, like *FOS*, *FOSB* and *ATF3* that were highly expressed in Dx cluster  
210 1 (Supplemental Figure 2B). Gene ontology (GO) analysis confirmed significant loss of  
211 expression for these and other genes involved in *AP-1/ATF-2* related transcription at Re  
212 (Supplemental Figure 2C). Furthermore, we evaluated the expression level of genes  
213 involved in PI3K/AKT/mTORC pathway, in which mTORC1 controls ribosomal biogenesis  
214 and protein translation<sup>33</sup>. We found the targets of mTORC1, like *RPS6KB1* and *EIF4E*, were  
215 differentially expressed in Re (Supplemental Figure 2D), suggesting a pathway shift from  
216 *AP-1* to mTORC1. Besides, we observed the upregulation of the upstream *K/NRAS* genes in  
217 Re, which may be markers for diagnosis/ prognosis and treatment target.

218 The UMAP for patient s292 showed 3 distinct clusters (Supplemental Figure 3A). DEG  
219 between Dx clusters 1 and 2 revealed *IDH1*, an enzyme in the TCA cycle, and *RAB31*

220 involved in membrane fusion and exocytosis in clusters 1 , whereas MPO and PROM1,  
221 markers for GMP cells, are differentially expressed in cluster2 (Supplemental Figure 3B-C).  
222 Cells in cluster 3 originate from the Re sample and overexpressed genes like *DDIT4*<sup>34</sup>,  
223 *PIM3*<sup>35</sup> and *CD74*<sup>36</sup> were previously associated with poor prognosis (Supplemental Figure  
224 3B). GO analysis indicated regulation of cell death and apoptotic process terms in cluster 3  
225 (Supplemental Figure 3C). For patient s2275, the single cell expression analysis detected 5  
226 clusters. Cluster 1 mainly originated from Dx cells, whereas cluster 5 almost entirely  
227 consisted of Re cells. Clusters 2-4 however were a mixture between Dx and Re cells  
228 (Supplemental Figure 4A-B). DEGs revealed few differences between cluster 1 and 5, such  
229 as *RNU4ATAC* and *RYBP* involved in RNA biosynthesis and metabolics that are differential  
230 expressed in cluster 1 (Dx) (Supplemental Figure 4B-C), whereas *ITM2A* and *CLEC12A* for  
231 leukocyte activation and *LDHA* for ribonucleotide metabolics are differentially expressed  
232 in cluster 5 (Re) (Supplemental Figure 4B-C). The minor differences between Dx and Re is  
233 consistent with the fact that AML-associated mutations, such as *WT1*, *CEBPA* and *NUP98-  
234 NSD1* are retained at Re (Figure 2C, Supplemental Table 2).

235 The Dx and Re cells of patient s3432 formed distinct clusters that are highly separated from  
236 each other and the other *FLT3*-ITD patients (Figure 3A). Cluster analysis detected four  
237 groups of cells that largely separated Dx (cluster 1) from Re cells (cluster 2-4; Figure 4A).  
238 Cluster 1 had a characteristic gene signature of transcription factors involved in  
239 proliferation and cell growth (e.g., *JUN*, *FOS*, *FOSB*, *EGR1*, *SOX4* and *KLF6*) that were  
240 significantly downregulated in the relapse clusters (Figure 4B-C). The Re-specific clusters 3-  
241 4 upregulated genes involved in the RAS/mTORC pathway, such as *ANKRD28* and *PIK3R1*,  
242 whereas cluster 2 is hallmarked by cell cycle related genes, such as *TOP2A* and *MKI67*.  
243 Pathway enrichment analysis confirmed the overrepresentation of AP-1/ATF2 transcription  
244 factors in cluster 1 (Dx) and additionally revealed upregulation of genes involved in mTOR  
245 signaling, like *RICTOR*, *PIK3R1* and *HIF1A* in cluster 3 (Re; Figure 4C-D). This suggests a  
246 pathway switch from AP-1 in the diagnosis cells towards mTOR in the relapse cells. We  
247 further observed that *KRAS* and *NRAS*, genes upstream of mTORC, were also overexpressed  
248 in the Re sample (Supplemental Figure 5A). Interestingly, cluster 4 in relapse is  
249 characterized by elevated exocytosis (Supplemental Figure 5B) and increased expression  
250 of genes related to Tim-3-galectin-9 Secretory Pathway (e.g. *ADGRL1*, *HAVCR2* and *LGALS9*)  
251 that protect AML cells against from the host immune system in an mTOR dependent  
252 manner<sup>37</sup> (Supplemental Figure 5C), in particular from NK- and T-cell action. Finally, the  
253 leukemia stem cell (LSC) score, a 17-gene signature (LSC17) that correlates with  
254 aggressiveness of the leukemia and a poor outcome<sup>21</sup> was significantly higher in the Re  
255 clusters 3 and 4 compared to the Dx cluster 1 (Figure 4E).

256

257 **Leukemic Stem Cell-like cells in *AML1-ETO***

258 In line with elevated expression of the *RUNX1T1* (aka *ETO*) and the well-known target gene  
259 *POU4F1* (Figure 3C), *AML1-ETO* fusion transcripts were detected in the Dx and Re samples  
260 of both patients (Figure 1A, Supplemental Table 2). WES analysis had further revealed that  
261 both patients suffered from one (s220) or two *KIT* mutations at time of Dx that were  
262 retained for patient s220 at Re, but largely or exclusively lost for patient s914 (Figure 1C,  
263 Supplemental Table 2). Surprisingly, UMAP and DEG analysis revealed significantly larger  
264 transcriptional changes for patient s220 compared to s914 (Figure 3C, Supplemental Figure  
265 1C). Possibly, these transcriptional changes are induced by the somatic mutations in genes  
266 that are not widely associated with AML, like *BLCAP*, *TGM7*, *PADI2* and *KIAA1755* (Figure  
267 1C). Higher *MPO*, a marker for granulocyte/monocyte progenitors (GMPs) expression<sup>30</sup>  
268 within both the *AML1-ETO* patients (Figure 3C) implies that most cells are arrested at a  
269 “GMP-like” stage.

270 Analysis on Dx-Re showed that the number of DEGs shared between these two *AML1-ETO*  
271 patients is minimal as for the *FLT3-ITDs* (Supplemental Figure 1C). Therefore, we  
272 performed an in-depth analysis on the transcriptional dynamics between Dx and Re  
273 separately for these two patients. Focussing on patient s914 first, the synergic oncogenes  
274 (*PIM1* and *MYC*<sup>38</sup>) responsible for tumorigenesis were co-differentially expressed at Re  
275 compared to Dx. Cluster analysis revealed five groups of cells (Figure 5A-B) and a small  
276 cluster of scattered cells that expressed signatures of progenitors (*CD34*), erythrocytes  
277 (*HBB*), monocytes (*LYZ*), B-cells (*MSA41*) and cell cycle related genes (*TOP2A*, *MKI67*)  
278 (Supplemental Figure 6) likely resulting from ambient RNA or cell doublets and hence were  
279 discarded in subsequent analyses.

280 Cluster 1 mainly consist of Dx cells and differentially expressed genes for differentiation  
281 and resistance to apoptosis, like *AREG*<sup>39</sup>. Interestingly, cells in cluster 2 express *CD34* as  
282 well as genes involved in cell migration (*ANXA1*<sup>40</sup>, *ANXA2*<sup>41</sup>, *VIM*<sup>42</sup> and *EMP1*<sup>43</sup>) but lacked  
283 the expression of *MPO* (Figure 5B,D). To investigate whether and from which Dx cluster  
284 these potential Re LSCs originate, we aligned cells in pseudo-time based on the gradient of  
285 transcriptional differences using Monicle3. This trajectory analysis suggested a continuous  
286 transition between the Dx and Re sample (Figure 5C). Cells in cluster 2 and 3 differentially  
287 expressed genes for hematopoietic stem cell maintenance (*GDF11*<sup>44</sup>, *GATA2*<sup>45</sup>) and  
288 differentiation (*GAS7*<sup>46</sup>, *CAMK1D*<sup>47</sup>) markers as well as *CD34* (Figure 5B,D), indicating  
289 cluster 2 and 3 are the putative starting points of this trajectory. Besides, cluster 2 and 3  
290 overexpressed genes *CXCR4*<sup>48</sup> and *CXCL8*<sup>49</sup> for tumor microenvironment (Figure 5B,D). In  
291 line with those findings, we calculated the LSC17- and cell cycle scores for all clusters. We  
292 observed that cells in Dx cluster 3 has the highest LSC17 score followed by Re cluster 2  
293 (Figure 5E). Moreover, cells from cluster 2 and 3 mainly reside in the G1 phase of the cell  
294 cycle (Figure 5F). Interestingly, the trajectory suggest that these cells differentiate into a  
295 population of cells that display *DUSP6* and AP-1 related genes like *JUN* and *FOS* in the Re-  
296 specific clusters 3 and 4 (Figure 5D).



297 UMAP shows that s220 cells separate according to Dx and Re which partitioned into 9  
298 clusters (Figure 6A). Clusters 1-4 contained Dx cells that were enriched for *CXCL8* and  
299 *CXCR4*, genes associated with the interaction between leukemia blasts and stromal  
300 cells<sup>48,49</sup>. Clusters 5-9 exclusively contained Re cells and were marked by expression of  
301 *LOXL1* and *FAM81A* (Figure 6B). Cell cycle-related genes (*MCM6*, *TOP2A*, *MKI67*) were  
302 highly expressed in cluster 1 and 9. Cluster 4 (Dx) and 5 (Re) are in close proximity to each  
303 other and share marker genes, such as *CAMK1D*, *GAS7*, *ANXA1/2*, *VIM* and *CD34* (Figure  
304 6B, Supplemental Figure 7A) suggesting that they are LSCs.

305

### 306 **Alternative “branching” from Re and Dx LSC-like cells in *AML1-ETO***

307 Given the high similarities between clusters 4 and 5 and their elevated *CD34* expression,  
308 we hypothesized that these clusters might be enriched in LSCs. Analysis showed that these  
309 clusters indeed have the highest LSC17-score and contain cells that reside predominantly  
310 in the G1 cell cycle phase (Figure 6C-D). To better understand the transcriptional dynamics  
311 of cell populations originating from these LSCs, we applied pseudo-time gene expression  
312 analysis (Figure 6E). This analysis reveals a trajectory starting from the presumed LSCs  
313 cluster 4 and 5 towards more differentiated cells that predominantly reside in the S-phase  
314 of the cell cycle and exhibit elevated expression of genes like *TOP2A* and *MKI67* (Figure 6D-  
315 F). For the Dx branch, genes involved in self-renewal that impede differentiation (*GAS7* and  
316 *CAMK1D*) or are associated with cell migration (*TPPP3*, *VIM*, *ANXA1/2*) had elevated  
317 expression in cluster 4. We hypothesized that all other clusters of cells originate from this  
318 presumed Dx LSC population. Indeed, we observed a downregulation of these markers  
319 when cells are traced along the trajectory from cluster 4 to cluster 1 which is consistent  
320 with their differentiation into more mature myeloid cells. Furthermore, *DUSP1* and *DUSP6*,  
321 genes required for cell differentiation and proliferation were upregulated as cells ‘moving  
322 away’ from cluster 4 along the Dx branch (Figure 6F). In the Re branch, *TPPP3*, *VIM*,  
323 *ANXA1/2*, *GAS7* and *CAMK1D* were upregulated in cluster 5 to a similar extent as in cluster  
324 4. Compared to the more gradual downregulation in the Dx branch, these markers were  
325 largely lost when cells “branched” from cluster 5 to cluster 6 (Figure 6F). The Re trajectory  
326 (cluster 5 towards cluster 9) is hallmarked by upregulation of numerous genes required for  
327 differentiation, leukemia progression and chemo-resistance, including *RACK1*<sup>50</sup>, *EREG*<sup>51</sup>  
328 and *LOXL1*<sup>52</sup> (Figure 6F). Another striking difference between the Dx and Re is that genes  
329 associated with the tumor microenvironment, the interaction between stroma cells and  
330 leukemic blasts (*CXCR4* and *CXCL8*) were lower expressed in cluster 5 (Re) compared to  
331 cluster 4 (Dx, Figure 6B). Gene Ontology analysis further revealed up-regulated genes in Dx  
332 enriched with terms associated with immune- and inflammatory response, whereas  
333 translation and biosynthesis related processes were highly enriched in Re (Supplemental  
334 Figure 7B).

335 In summary, our data reveals a heterogeneous mixture of cells in the *AML1-ETO* patients.  
336 Patient s220 showed more heterogeneity between Dx and Re compared with *AML1-ETO*  
337 s914. Interestingly in both patients, we found cells with a significantly elevated LSC17-score  
338 that are predominantly in the G1-phase. These cells appear to be at the origin of other cell  
339 populations that develop/branch in a way that is sample and stage specific. The signature  
340 genes for LSCs might be potentially therapeutic targets to improve the efficiency of AML  
341 treatment.

## 342 Discussion

343 To gain insight into the heterogeneity between AML subtypes and within Dx-Re pairs, we  
344 profiled the exome, gene fusions and single cell transcriptome of four *FLT3*-ITD and two  
345 *AML1-ETO* Dx-Re sample pairs. To our knowledge, this is one of the first studies analyzing  
346 Dx-Re pairs at an unprecedented depth of analysis. Clustering and differential expression  
347 analysis of single cell transcriptomes showed extensive intra- and inter-blasts  
348 heterogeneity. Genes that are differentially expressed between Dx and Re were highly  
349 patient-specific. Therefore, we chose a pairwise comparison and showed that differential  
350 expression is poorly predicted by altered somatic mutations in AML-associated genes. For  
351 example, one patient showed a pathway switch from AP-1 dependency at Dx to mTOR  
352 signaling at Re that appeared to be independent of altered somatic mutations, suggesting  
353 that clonal rearrangements are not causing the relapse<sup>53</sup>. In contrast, significantly altered  
354 mutations (e.g. loss of *NPM1* and *KIT*) in other patients were accompanied by minor  
355 transcriptional differences.

356 These results raise the question how the transcriptome of AML patients can be so  
357 drastically altered from Dx to Re in the absence of altered genomic aberrations? One  
358 possibility is that somatic mutations are gained or lost in regulatory regions that are not  
359 captured by exome sequencing. Alternatively, somatic mutations in genes that are  
360 currently not associated with AML may (collectively) contribute to therapy resistance. For  
361 example, in *FLT3*-ITD patient s3432 the clear separation of Dx and Re cells could be caused  
362 by de novo mutations in *FAT3*, *ITGB7*, *UBA2* and *SLC4A3*. Furthermore, the presence of  
363 quiescent LSC's that escape conventional therapeutic interventions could explain  
364 recurrence in the absence of clonal rearrangements<sup>14,54,55</sup>. In agreement with this  
365 hypothesis, we detected transcriptionally similar LSC-like cells in the Dx and Re samples of  
366 the two otherwise distinct *AML1-ETO* samples. While the expression of these LSC  
367 populations is similar at Dx and Re, their differentiation trajectories are remarkably  
368 different.

369 Our study is based on few Dx-Re pairs, but nevertheless reports important findings that  
370 strongly indicate differences in underlying resistance mechanisms that are not exclusively  
371 caused by clonal rearrangements. Leveraging rapid advances in single cell technology,  
372 future studies analyzing more cases at the current unprecedented depth can address  
373 whether LSCs are indeed clonally identical at Dx and Re and to what extent therapeutic  
374 interventions and epigenetic mechanisms drive these marked differences in gene  
375 expression. Such in depths knowledge obtained experimentally and bioinformatically will  
376 open novel avenues to prevent AML relapse.

377

## 378 Acknowledgements

379 This study was supported by the Princess Maxima Center for Pediatric Oncology, Utrecht the  
380 Netherlands, grants from ZonMw/ Bundesministerium fur Bildung und Forschung (German)



381 (BMBF; DRAMA 01KT1603); VALERE: Vanvitelli per la Ricerca; Campania Regional Government  
382 Technology Platform “Lotta alle Patologie Oncologiche”: iCURE; Campania Regional  
383 Government FASE2: IDEAL; MIUR, Proof of Concept POC01\_00043; Campania Regional  
384 Government: POR Campania FSE 2014-2020 ASSE III. Y.Z is a PhD student in co-tutele from  
385 the Traslational medicine PhD program at Vanvitelli University. W.M and N.D.G are supported  
386 by the Italian National Operational Programme on Research 2014-2020 (PON AIM 1859703-  
387 2). This work was carried out on the Dutch national e-infrastructure with the support of SURF  
388 Cooperative. Thank the lab members for fruitful discussions and suggestions.

389

### 390 **Author contributions**

391 Y.Z performed experiments; A.D and L.B provided WES data; Y.Z, P.S, W.M and H.S analyzed  
392 and interpreted data; A.D, P.B, N.A, N.D.G, K.D, H.D. S.M, J.M, L.A and L.B helped with data  
393 interpretation; Y.Z and H.S designed the research; Y.Z, P.S, W.M and H.S wrote the  
394 manuscript.

395

396

### 397 **Data Availability**

398 The high-throughput datasets have been deposited in the European Genome-phenome  
399 Archive. The accession numbers for single cell RNA-seq, bulk RNA-Seq and Whole exome  
400 sequencing datasets are EGAD00001008373, EGAD00001008374 and EGAD00001008375,  
401 respectively.

## 402 References

403

- 404 1. Horton SJ, Huntly BJP. Recent advances in acute myeloid leukemia stem cell biology.  
405 *Haematol J*. 2012;97(7). doi:10.3324/haematol.2011.054734
- 406 2. Kao HW, Liang DC, Wu JH, et al. Gene Mutation Patterns in Patients with Minimally  
407 Differentiated Acute Myeloid Leukemia. *Neoplasia (United States)*. 2014;16(6):481-  
408 488. doi:10.1016/j.neo.2014.06.002
- 409 3. Gary Gilliland D, Griffin JD. The roles of FLT3 in hematopoiesis and leukemia. *Blood*.  
410 2002;100(5):1532-1542. doi:10.1182/blood-2002-02-0492
- 411 4. Stirewalt DL, Kopecky KJ, Meshinchi S, et al. FLT3, RAS, and TP53 mutations in elderly  
412 patients with acute myeloid leukemia. *Blood*. 2001;97(11):3589-3595.  
413 doi:10.1182/blood.V97.11.3589
- 414 5. Ku B, Geugien M, Schepers H, Westra J, Lemmink HH, Vellenga E. Constitutive NF- $\kappa$ B  
415 DNA-binding activity in AML is frequently mediated by a Ras/PI3-K/PKB-dependent  
416 pathway. *Leukemia*. 2004;18:103-112. doi:10.1038/sj.leu.2403145
- 417 6. Wang Y-Y, Zhou G-B, Yin T, et al. AML1-ETO and C-KIT mutation overexpression in  
418 t(8;21) leukemia: Implication in stepwise leukemogenesis and response to Gleevec.  
419 *PNAS*. 2005;102(4). www.pnas.org/cgi/doi/10.1073/pnas.0408831102
- 420 7. Mulloy JC, Cammenga J, MacKenzie KL, Berguido FJ, Moore MAS, Nimer SD. The  
421 AML1-ETO fusion protein promotes the expansion of human hematopoietic stem  
422 cells. *Blood*. 2002;99(1):15-23. doi:10.1182/blood.V99.1.15
- 423 8. Pabst T, Mueller BU, Zhang P, et al. Dominant-negative mutations of CEBPA, encoding  
424 CCAAT/enhancer binding protein- $\alpha$  (C/EBP $\alpha$ ), in acute myeloid leukemia. *Nat Genet*.  
425 2001;27(3):263-270. doi:10.1038/85820
- 426 9. Ferrara F, Schiffer CA. Acute myeloid leukaemia in adults. In: *The Lancet*. Vol 381.  
427 *Lancet*; 2013:484-495. doi:10.1016/S0140-6736(12)61727-9
- 428 10. Siveen KS, Uddin S, Mohammad RM. Targeting acute myeloid leukemia stem cell  
429 signaling by natural products. *Mol Cancer*. 2017;16(1):1-12. doi:10.1186/s12943-016-  
430 0571-x
- 431 11. Bertoli S, Tavitian S, Huynh A, et al. Improved outcome for AML patients over the  
432 years 2000-2014. *Blood Cancer J*. 2017;7(12). doi:10.1038/s41408-017-0011-1
- 433 12. Parkin B, Ouillette P, Li Y, et al. Clonal evolution and devolution after chemotherapy in  
434 adult acute myelogenous leukemia. *Blood*. 2013;121(2):369-377. doi:10.1182/blood-  
435 2012-04-427039
- 436 13. Jiang L, Li XP, Dai YT, et al. Multidimensional study of the heterogeneity of leukemia  
437 cells in t(8;21) acute myelogenous leukemia identifies the subtype with poor  
438 outcome. *Proc Natl Acad Sci U S A*. 2020;117(33):20117-20126.  
439 doi:10.1073/PNAS.2003900117
- 440 14. Stetson LC, Balasubramanian D, Ribeiro SP, et al. Single cell RNA sequencing of AML  
441 initiating cells reveals RNA-based evolution during disease progression. *Leukemia*.  
442 2021;(May 2020):1-14. doi:10.1038/s41375-021-01338-7
- 443 15. Muraro MJ, Dharmadhikari G, Grün D, et al. A Single-Cell Transcriptome Atlas of the  
444 Human Pancreas. *Cell Syst*. 2016;3(4):385-394.e3. doi:10.1016/j.cels.2016.09.002
- 445 16. Hashimshony T, Senderovich N, Avital G, et al. CEL-Seq2: Sensitive highly-multiplexed  
446 single-cell RNA-Seq. *Genome Biol*. 2016;17(1):1-7. doi:10.1186/s13059-016-0938-8
- 447 17. Haas BJ, Dobin A, Stransky N, et al. STAR-Fusion: Fast and Accurate Fusion Transcript

- 448 Detection from RNA-Seq. *bioRxiv*. Published online March 2017:120295.  
449 doi:10.1101/120295
- 450 18. Schmalbrock LK, Dolnik A, Cocciardi S, et al. Clonal evolution of acute myeloid  
451 leukemia with FLT3-ITD mutation under treatment with midostaurin. *Blood*.  
452 2021;137(22):3093-3104. doi:10.1182/blood.2020007626
- 453 19. Trapnell C, Cacchiarelli D, Grimsby J, et al. The dynamics and regulators of cell fate  
454 decisions are revealed by pseudotemporal ordering of single cells. *Nat Biotechnol*.  
455 2014;32. doi:10.1038/nbt.2859
- 456 20. Cao J, Spielmann M, Qiu X, et al. The single-cell transcriptional landscape of  
457 mammalian organogenesis. *Nature*. 2019;566. doi:10.1038/s41586-019-0969-x
- 458 21. Ng SWK, Mitchell A, Kennedy JA, et al. A 17-gene stemness score for rapid  
459 determination of risk in acute leukaemia. *Nature*. 2016;540(7633):433-437.  
460 doi:10.1038/nature20598
- 461 22. Ding L, Ley TJ, Larson DE, et al. Clonal evolution in relapsed acute myeloid leukaemia  
462 revealed by whole-genome sequencing. *Nature*. 2012;481(7382):506-510.  
463 doi:10.1038/nature10738
- 464 23. Cairoli R, Beghini A, Grillo G, et al. Prognostic impact of c-KIT mutations in core  
465 binding factor leukemias: An Italian retrospective study. *Blood*. 2006;107(9):3463-  
466 3468. doi:10.1182/blood-2005-09-3640
- 467 24. Jahn N, Terzer T, Sträng E, et al. Genomic heterogeneity in core-binding factor acute  
468 myeloid leukemia and its clinical implication. *Blood Adv*. 2020;4(24):6342-6352.  
469 doi:10.1182/bloodadvances.2020002673
- 470 25. Christen F, Hoyer K, Yoshida K, et al. Genomic landscape and clonal evolution of acute  
471 myeloid leukemia with t(8;21): An international study on 331 patients. *Blood*.  
472 2019;133(10):1140-1151. doi:10.1182/blood-2018-05-852822
- 473 26. Falini B, Mecucci C, Tiacci E, et al. Cytoplasmic Nucleophosmin in Acute Myelogenous  
474 Leukemia with a Normal Karyotype. *N Engl J Med*. 2005;352(3):254-266.  
475 doi:10.1056/nejmoa041974
- 476 27. Tate JG, Bamford S, Jubb HC, et al. COSMIC: The Catalogue Of Somatic Mutations In  
477 Cancer. *Nucleic Acids Res*. 2019;47(D1):D941-D947. doi:10.1093/nar/gky1015
- 478 28. McInnes L, Healy J, Melville J. *UMAP: Uniform Manifold Approximation and Projection*  
479 *for Dimension Reduction.*; 2020.
- 480 29. Dunne J, Gascoyne DM, Lister TA, Brady HJM, Heidenreich O, Young BD. AML1/ETO  
481 proteins control POU4F1/BRN3A expression and function in t(8;21) acute myeloid  
482 leukemia. *Cancer Res*. 2010;70(10):3985-3995. doi:10.1158/0008-5472.CAN-09-3604
- 483 30. van Galen P, Hovestadt V, Wadsworth MH, et al. Single-Cell RNA-Seq Reveals AML  
484 Hierarchies Relevant to Disease Progression and Immunity. *Cell*. 2019;176(6):1265-  
485 1281.e24. doi:10.1016/j.cell.2019.01.031
- 486 31. Verhaak RGW, Goudswaard CS, Van Putten W, et al. Mutations in nucleophosmin  
487 (NPM1) in acute myeloid leukemia (AML): Association with other gene abnormalities  
488 and previously established gene expression signatures and their favorable prognostic  
489 significance. *Blood*. 2005;106(12):3747-3754. doi:10.1182/blood-2005-05-2168
- 490 32. Hollink IHIM, Van Den Heuvel-Eibrink MM, Arentsen-Peters STCJM, et al.  
491 NUP98/NSD1 characterizes a novel poor prognostic group in acute myeloid leukemia  
492 with a distinct HOX gene expression pattern. *Blood*. 2011;118(13):3645-3656.  
493 doi:10.1182/blood-2011-04-346643
- 494 33. Foster KG, Fingar DC. Mammalian target of rapamycin (mTOR): Conducting the

- 495 cellular signaling symphony. *J Biol Chem.* 2010;285(19):14071-14077.  
496 doi:10.1074/jbc.R109.094003
- 497 34. Cheng Z, Dai Y, Pang Y, et al. Up-regulation of DDIT4 predicts poor prognosis in acute  
498 myeloid leukaemia. *J Cell Mol Med.* 2020;24(1):1067. doi:10.1111/JCMM.14831
- 499 35. Qu Y, Zhang C, Du E, et al. Pim-3 is a Critical Risk Factor in Development and Prognosis  
500 of Prostate Cancer. *Med Sci Monit.* 2016;22:4254. doi:10.12659/MSM.898223
- 501 36. Ruvolo PP, Hu CW, Qiu Y, et al. LGALS3 is connected to CD74 in a previously unknown  
502 protein network that is associated with poor survival in patients with AML.  
503 *EBioMedicine.* 2019;44:126-137. doi:10.1016/J.EBIOM.2019.05.025
- 504 37. Gonçalves Silva I, Yasinska IM, Sakhnevych SS, et al. The Tim-3-galectin-9 Secretory  
505 Pathway is Involved in the Immune Escape of Human Acute Myeloid Leukemia Cells.  
506 *EBioMedicine.* 2017;22:44-57. doi:10.1016/j.ebiom.2017.07.018
- 507 38. Wang J, Kim J, Roh M, et al. Pim1 kinase synergizes with c-MYC to induce advanced  
508 prostate carcinoma. *Oncogene.* Published online 2010. doi:10.1038/onc.2010.10
- 509 39. Busser B, Sancey L, Brambilla E, Coll JL, Hurbin A. The multiple roles of amphiregulin  
510 in human cancer. *Biochim Biophys Acta - Rev Cancer.* 2011;1816(2):119-131.  
511 doi:10.1016/J.BBCAN.2011.05.003
- 512 40. Moraes LA, Kar S, Foo SL, et al. Annexin-A1 enhances breast cancer growth and  
513 migration by promoting alternative macrophage polarization in the tumour  
514 microenvironment OPEN. *Sci Rep.* Published online 2017. doi:10.1038/s41598-017-  
515 17622-5
- 516 41. Staquicini DI, Rangel R, Guzman-Rojas L, et al. Intracellular targeting of annexin A2  
517 inhibits tumor cell adhesion, migration, and in vivo grafting OPEN. *Sci Rep.* Published  
518 online 2017. doi:10.1038/s41598-017-03470-w
- 519 42. Wu S, Du Y, Beckford J, Alachkar H. Upregulation of the EMT marker vimentin is  
520 associated with poor clinical outcome in acute myeloid leukemia. *J Transl Med.*  
521 2018;16:170. doi:10.1186/s12967-018-1539-y
- 522 43. Khusni M, Amin BA, Shimizu A, et al. Epithelial membrane protein 1 promotes tumor  
523 metastasis by enhancing cell migration via copine-III and Rac1. *Oncogene.*  
524 2018;37:5416-5434. doi:10.1038/s41388-018-0286-0
- 525 44. Kumar S, Nattamai KJ, Hassan A, et al. Repolarization of HSC attenuates HSCs failure  
526 in Shwachman-Diamond syndrome. *Leukemia.* 2021;35:1751-1762.  
527 doi:10.1038/s41375-020-01054-8
- 528 45. Menendez-Gonzalez JB, Vukovic M, Abdelfattah A, et al. Gata2 as a Crucial Regulator  
529 of Stem Cells in Adult Hematopoiesis and Acute Myeloid Leukemia. *Stem Cell Reports.*  
530 2019;13(2):291-306. doi:10.1016/j.stemcr.2019.07.005
- 531 46. Moorthy PP, Kumar AA, Devaraj H. Expression of the gas7 Gene and Oct4 in  
532 Embryonic Stem Cells of Mice. *Stem Cells Dev.* 2005;14(6):664-670.  
533 doi:10.1089/scd.2005.14.664
- 534 47. Zhang Y, Xia F, Liu X, et al. JAM3 maintains leukemia-initiating cell self-renewal  
535 through LRP5/AKT/ $\beta$ -catenin/CCND1 signaling. *J Clin Invest.* 2018;128(5):1737-1751.  
536 doi:10.1172/JCI93198
- 537 48. Tavor S, Petit I, Porozov S, et al. CXCR4 Regulates Migration and Development of  
538 Human Acute Myelogenous Leukemia Stem Cells in Transplanted NOD/SCID Mice.  
539 *Cancer Res.* 2004;64(8):2817-2824. doi:10.1158/0008-5472.can-03-3693
- 540 49. Matsuo Y, Ochi N, Sawai H, et al. CXCL8/IL-8 and CXCL12/SDF-1a co-operatively  
541 promote invasiveness and angiogenesis in pancreatic cancer. *Int J Cancer.*

- 542 2009;124:853-861. doi:10.1002/ijc.24040
- 543 50. Xiao T, Zhu W, Huang W, et al. RACK1 promotes tumorigenicity of colon cancer by  
544 inducing cell autophagy. *Cell death Dis.* Published online 2018. doi:10.1038/s41419-  
545 018-1113-9
- 546 51. He M, Jin • Qianni, Chen C, et al. The miR-186-3p/EREG axis orchestrates tamoxifen  
547 resistance and aerobic glycolysis in breast cancer cells. *Oncogene.* Published online  
548 2019. doi:10.1038/s41388-019-0817-3
- 549 52. Yu H, Ding J, Zhu H, et al. LOXL1 confers antiapoptosis and promotes gliomagenesis  
550 through stabilizing BAG2. *Cell Death Differ.* 2020;27:3021-3036. doi:10.1038/s41418-  
551 020-0558-4
- 552 53. Kuczynski EA, Sargent DJ, Kerbel RS. Drug rechallenge and treatment beyond  
553 progression— implications for drug resistance. *Nat Rev Clin Oncol.* 2013;10(10):571-  
554 587. doi:10.1038/nrclinonc.2013.158.Drug
- 555 54. Reilly EO, Zeinabad HA, Szegezdi E. Hematopoietic versus leukemic stem cell  
556 quiescence : Challenges and therapeutic opportunities. *Blood Rev.*  
557 2021;(May):100850. doi:10.1016/j.blre.2021.100850
- 558 55. Duy C, Li M, Teater M, et al. Chemotherapy Induces Senescence-Like Resilient Cells  
559 Capable of Initiating AML Recurrence. 2021;(June). doi:10.1158/2159-8290.CD-20-  
560 1375

561

## 562 **Figure Legends**

563

### 564 **Figure 1. Whole exome- and gene fusion analysis between Dx and Re**

565 (A) Oncoplot from WES showing 14 selected somatic mutations across 6 patients (red: n=2  
566 AML1-ETO; blue: n=4 FLT3-ITD). Mutations with at least 5 reads on ALT allele and VAF  $\geq$  0.05  
567 are presented. Vertical bars depict the number of mutations detected per sample;  
568 horizontal bars depict the (relative) frequency of a particular mutation. (B) Gene fusions  
569 detected from bulk RNA-seq. (C) Mutations with a VAF  $\geq$  0.2 at Dx or Re for which the VAF  
570 changed significantly. For all bars,  $p < 0.05$ , Fisher's exact test with Benjamini-Hochberg  
571 correction. Red: mutations more abundant at Dx. Blue: mutations more abundant at Re.

572

### 573 **Figure 2. Single cell transcriptomics reveals distinct AML-phenotypes**

574 (A) UMAP of the six AML pairs, colored by primary mutation (red: AML1-ETO; blue: FLT3-ITD);  
575 (B) UMAP colored by sample; (C) Heatmap showing the top 20 marker genes per primary  
576 mutation **D**, Violin plots depicting gene expression at known NPM1 target genes in FLT3-ITD  
577 samples with- and without NPM1 mutation.

578

### 579 **Figure 3. Single cell transcriptomics reveals heterogeneity amongst patients**

580 (A) UMAP of the four sample pairs with a FLT3-ITD, colored by sample (red: Dx; blue: Re); (B)  
581 Heatmap displaying the top 5 marker genes per sample (FLT3-ITD); (C) UMAP of the two



582 *AML1-ETO* sample pairs, colored by sample; (D) Heatmap displaying the top 10 marker  
583 genes per sample.

584

585 **Figure 4. Pathway switch between AP-1 and RAS signaling in high risk *FLT3*-ITD (s3432)**

586 (A) UMAP of Dx and Re cells for *FLT3*-ITD patient s3432 colored by timepoint (top) or cell  
587 cluster (bottom). (B) Heatmap displaying the top 10 cluster marker genes. Color represents  
588 row normalized expression values. (C) Overrepresented GO terms (category: biological  
589 pathway) in cluster 1 (Dx) and 3 (Re). P-values: hypergeometric test (BH-corrected). (D) The  
590 expression of genes related to AP-1 transcription factor network and RAS signaling pathway  
591 in each timepoint. (E) Calculation of LSC17 score for each cluster, and p-value was calculated  
592 using Student's t-test. \*  $p < 0.05$ , \*\*  $p < 0.01$ , \*\*\*  $p < 0.001$ .

593

594 **Figure 5. Putative LSCs detected in *AML1-ETO* pair (s914)**

595 (A) UMAP of Dx and Re cells for *AML1-ETO* patient s914, colored by timepoint (top) and cell  
596 cluster (bottom). Cells in cluster 6 express ambiguous marker genes, and may be doublets or  
597 contaminated by ambient RNA and were discarded (see also Supplemental figure 6). (B)  
598 Heatmap depicting the top 7 cluster markers. Color represents row normalized expression  
599 values. (C) Pseudo-time trajectory colored by timepoint (top) or cell cluster (bottom). (D)  
600 Heatmap showing representative genes per cluster. (E) LSC17 scores per cluster. \*  $p < 0.05$ ,  
601 \*\*  $p < 0.01$ , \*\*\*  $p < 0.001$ , Student's t-test. (F) Barplots depicting the relative cell abundance  
602 per cell cycle phase (inferred from marker gene expression) for each cell cluster. Arrow: cells  
603 in cluster 2 and 3 predominantly reside in the G1 phase.

604

605 **Figure 6. Putative LSCs detected in *AML1-ETO* pair (s220)**

606 (A) UMAP of Dx and Re cells for *AML1-ETO* patient s220, colored by timepoint (top) and cell  
607 cluster (bottom). (B) Heatmap depicting the top 5 marker genes per cluster. Color represents  
608 row normalized expression values. (C) LSC17 scores per cluster. \*  $p < 0.05$ , \*\*  $p < 0.01$ , \*\*\*  $p$   
609  $< 0.001$ , Student's t-test. (D) top: Barplots depicting the relative cell abundance per cell cycle  
610 phase (inferred from marker gene expression) for each cell cluster. Arrow: cells in cluster 4  
611 and 5 predominantly reside in the G1 phase. Bottom: UMAP colored by cell cycle phase. (E)  
612 Pseudo-time trajectory colored by cell cluster (F) Heatmap depicting representative marker  
613 genes per cluster/inferred timepoint.

# Figure 1

## A Somatic variant class

■ Frame shift ins.    ■ Missense mut.    ■ Frame shift del.  
■ In frame ins.    ■ Splice site

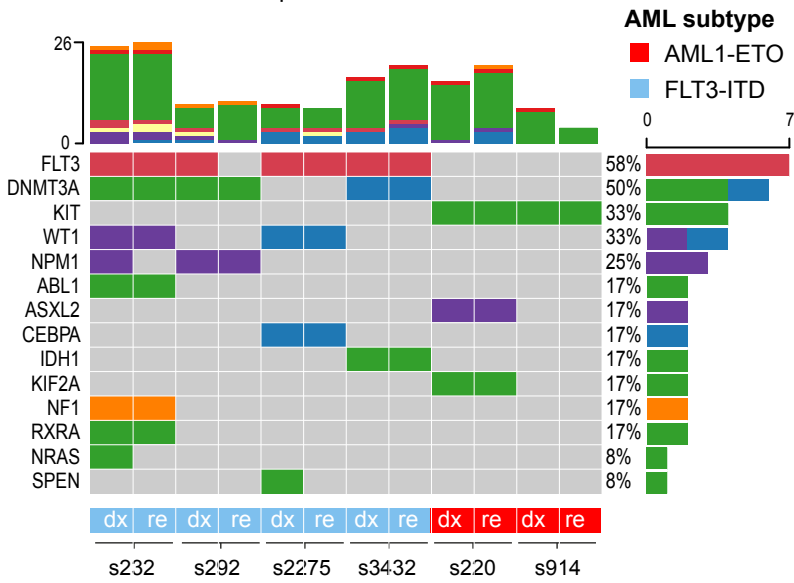

## B Fusion transcripts detected

■ yes    ■ no  
**AML subtype** ■ AML1-ETO ■ FLT3-ITD

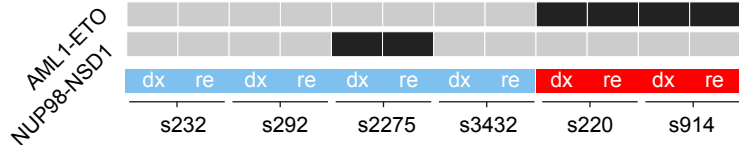

## C

**Timepoint** ■ Dx ■ Re

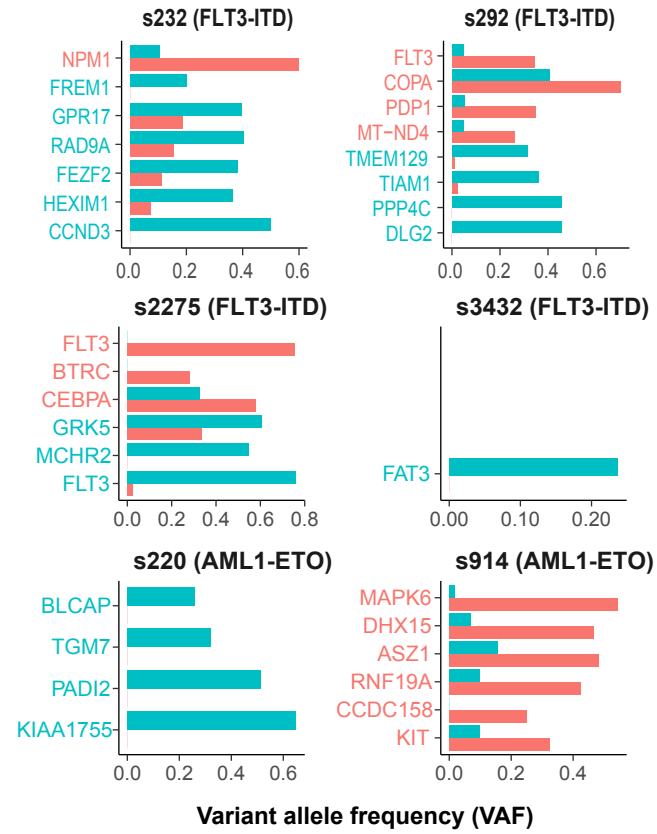

## Figure 2

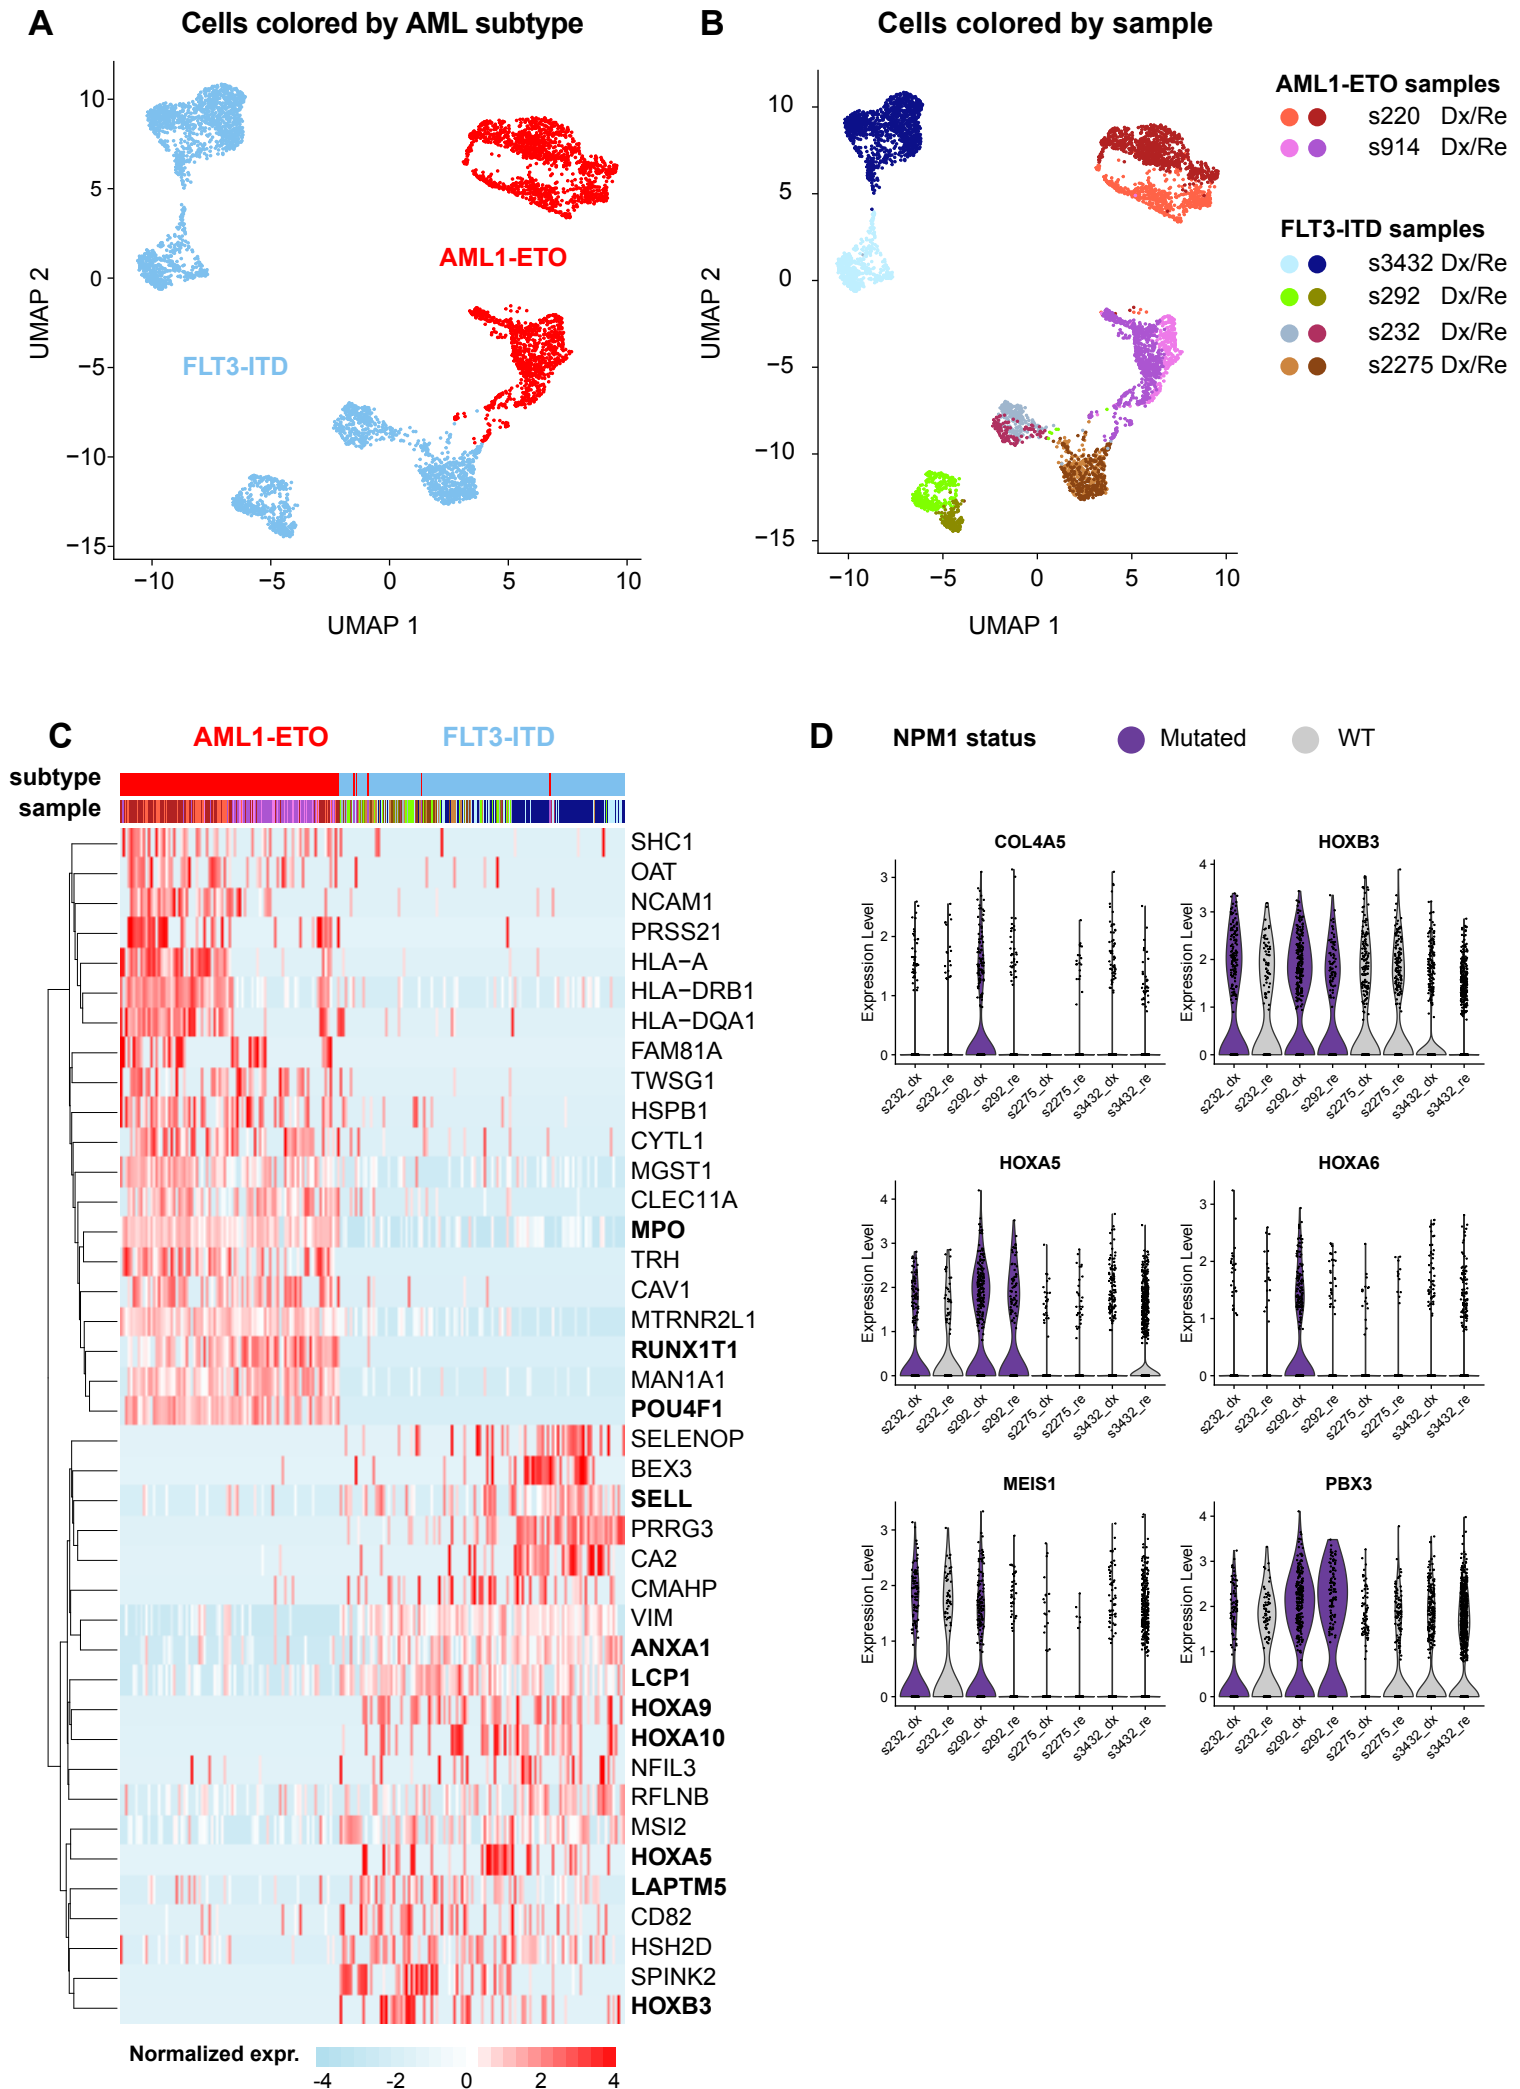



### Figure 3

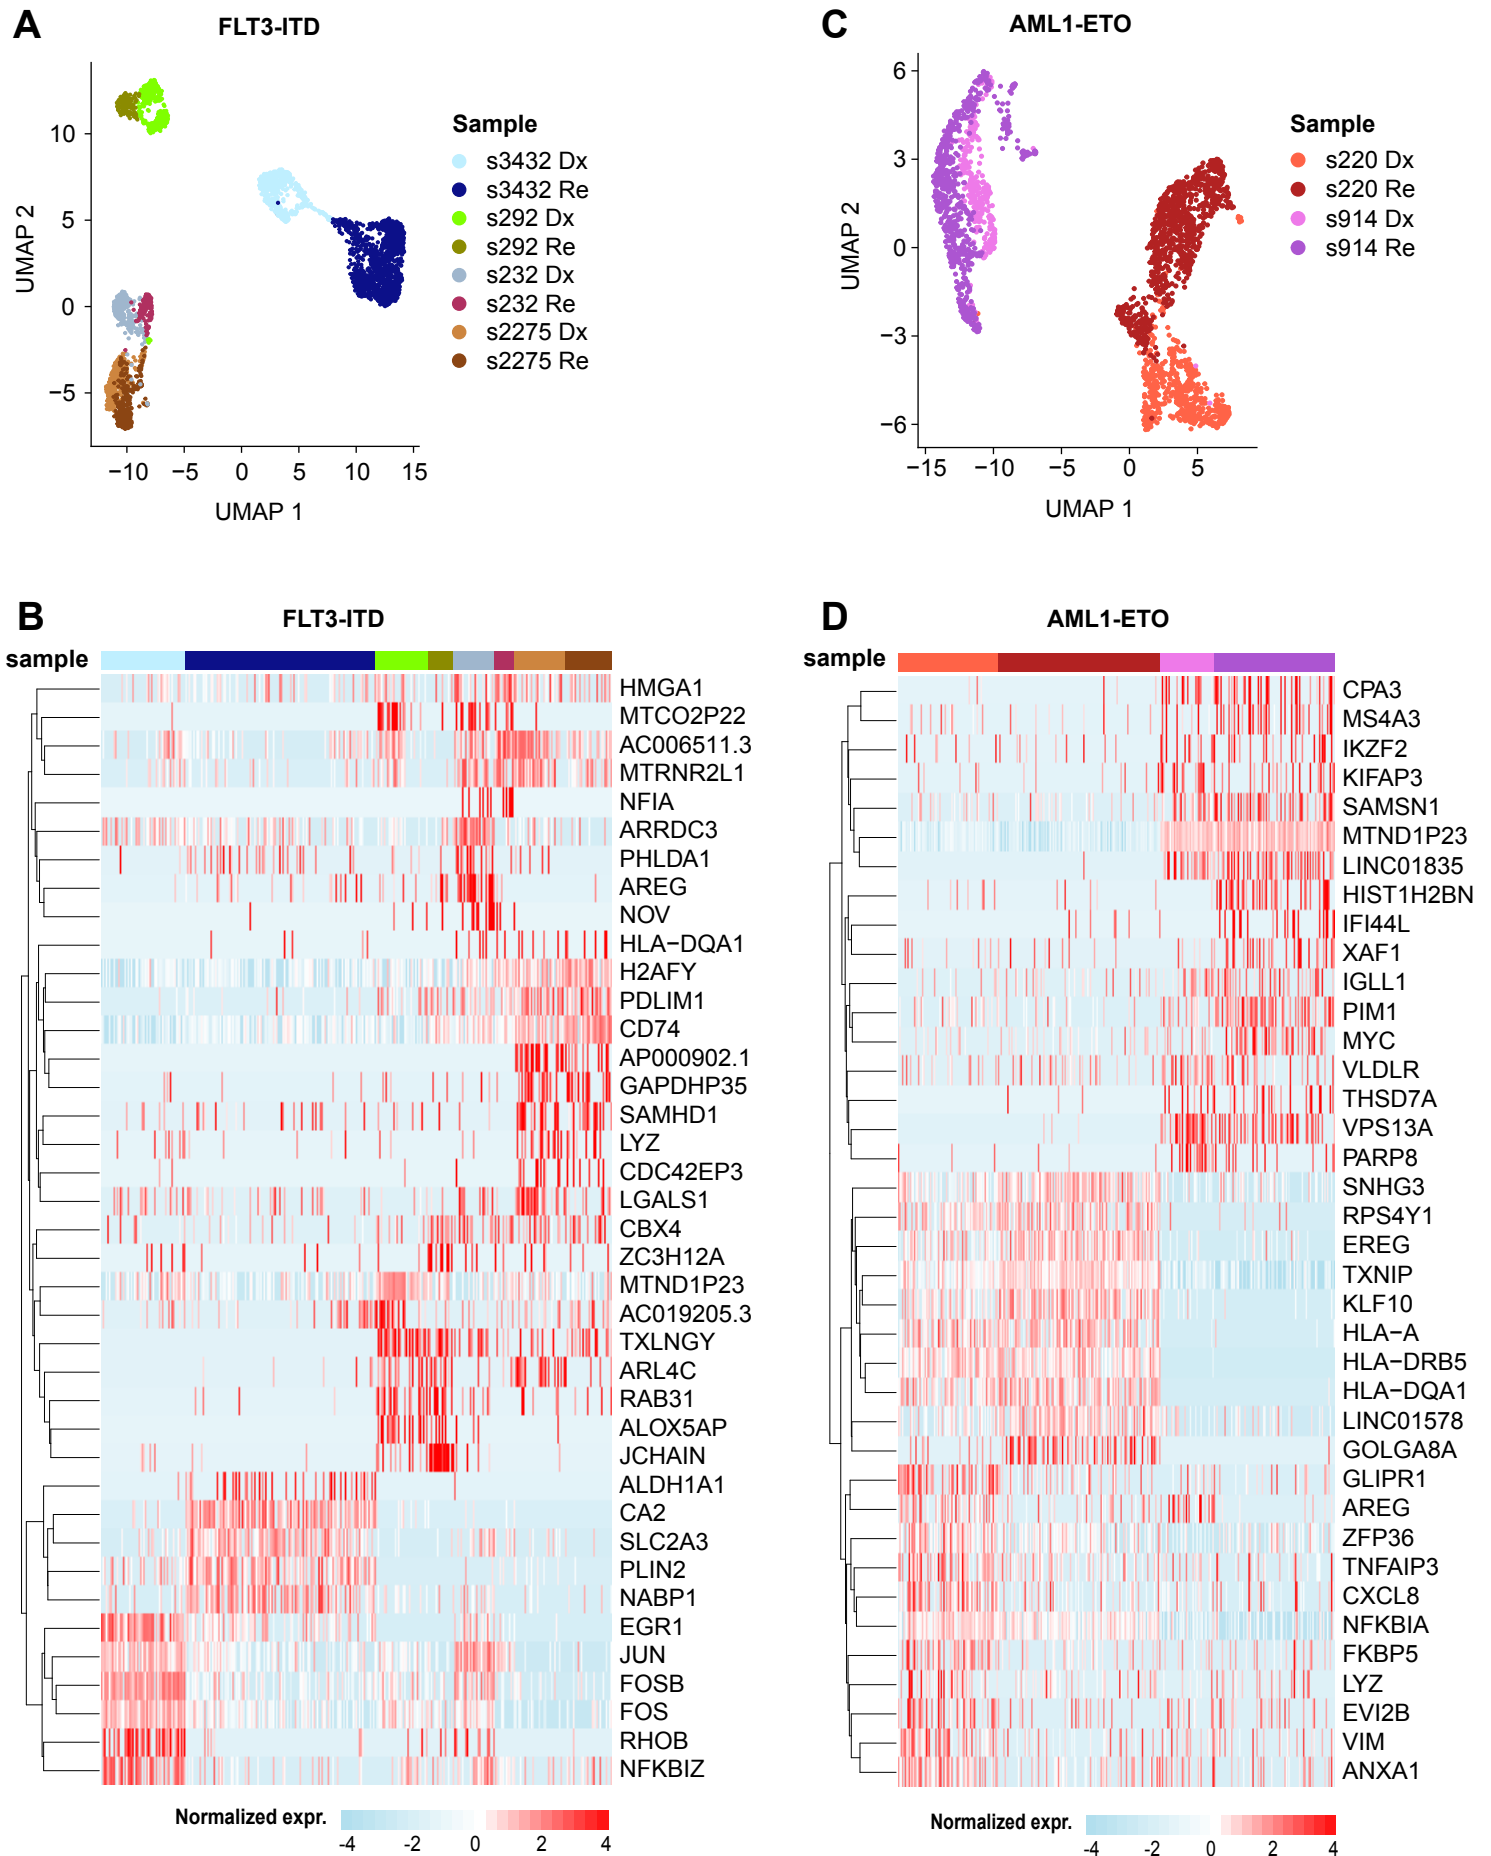

## Figure 4

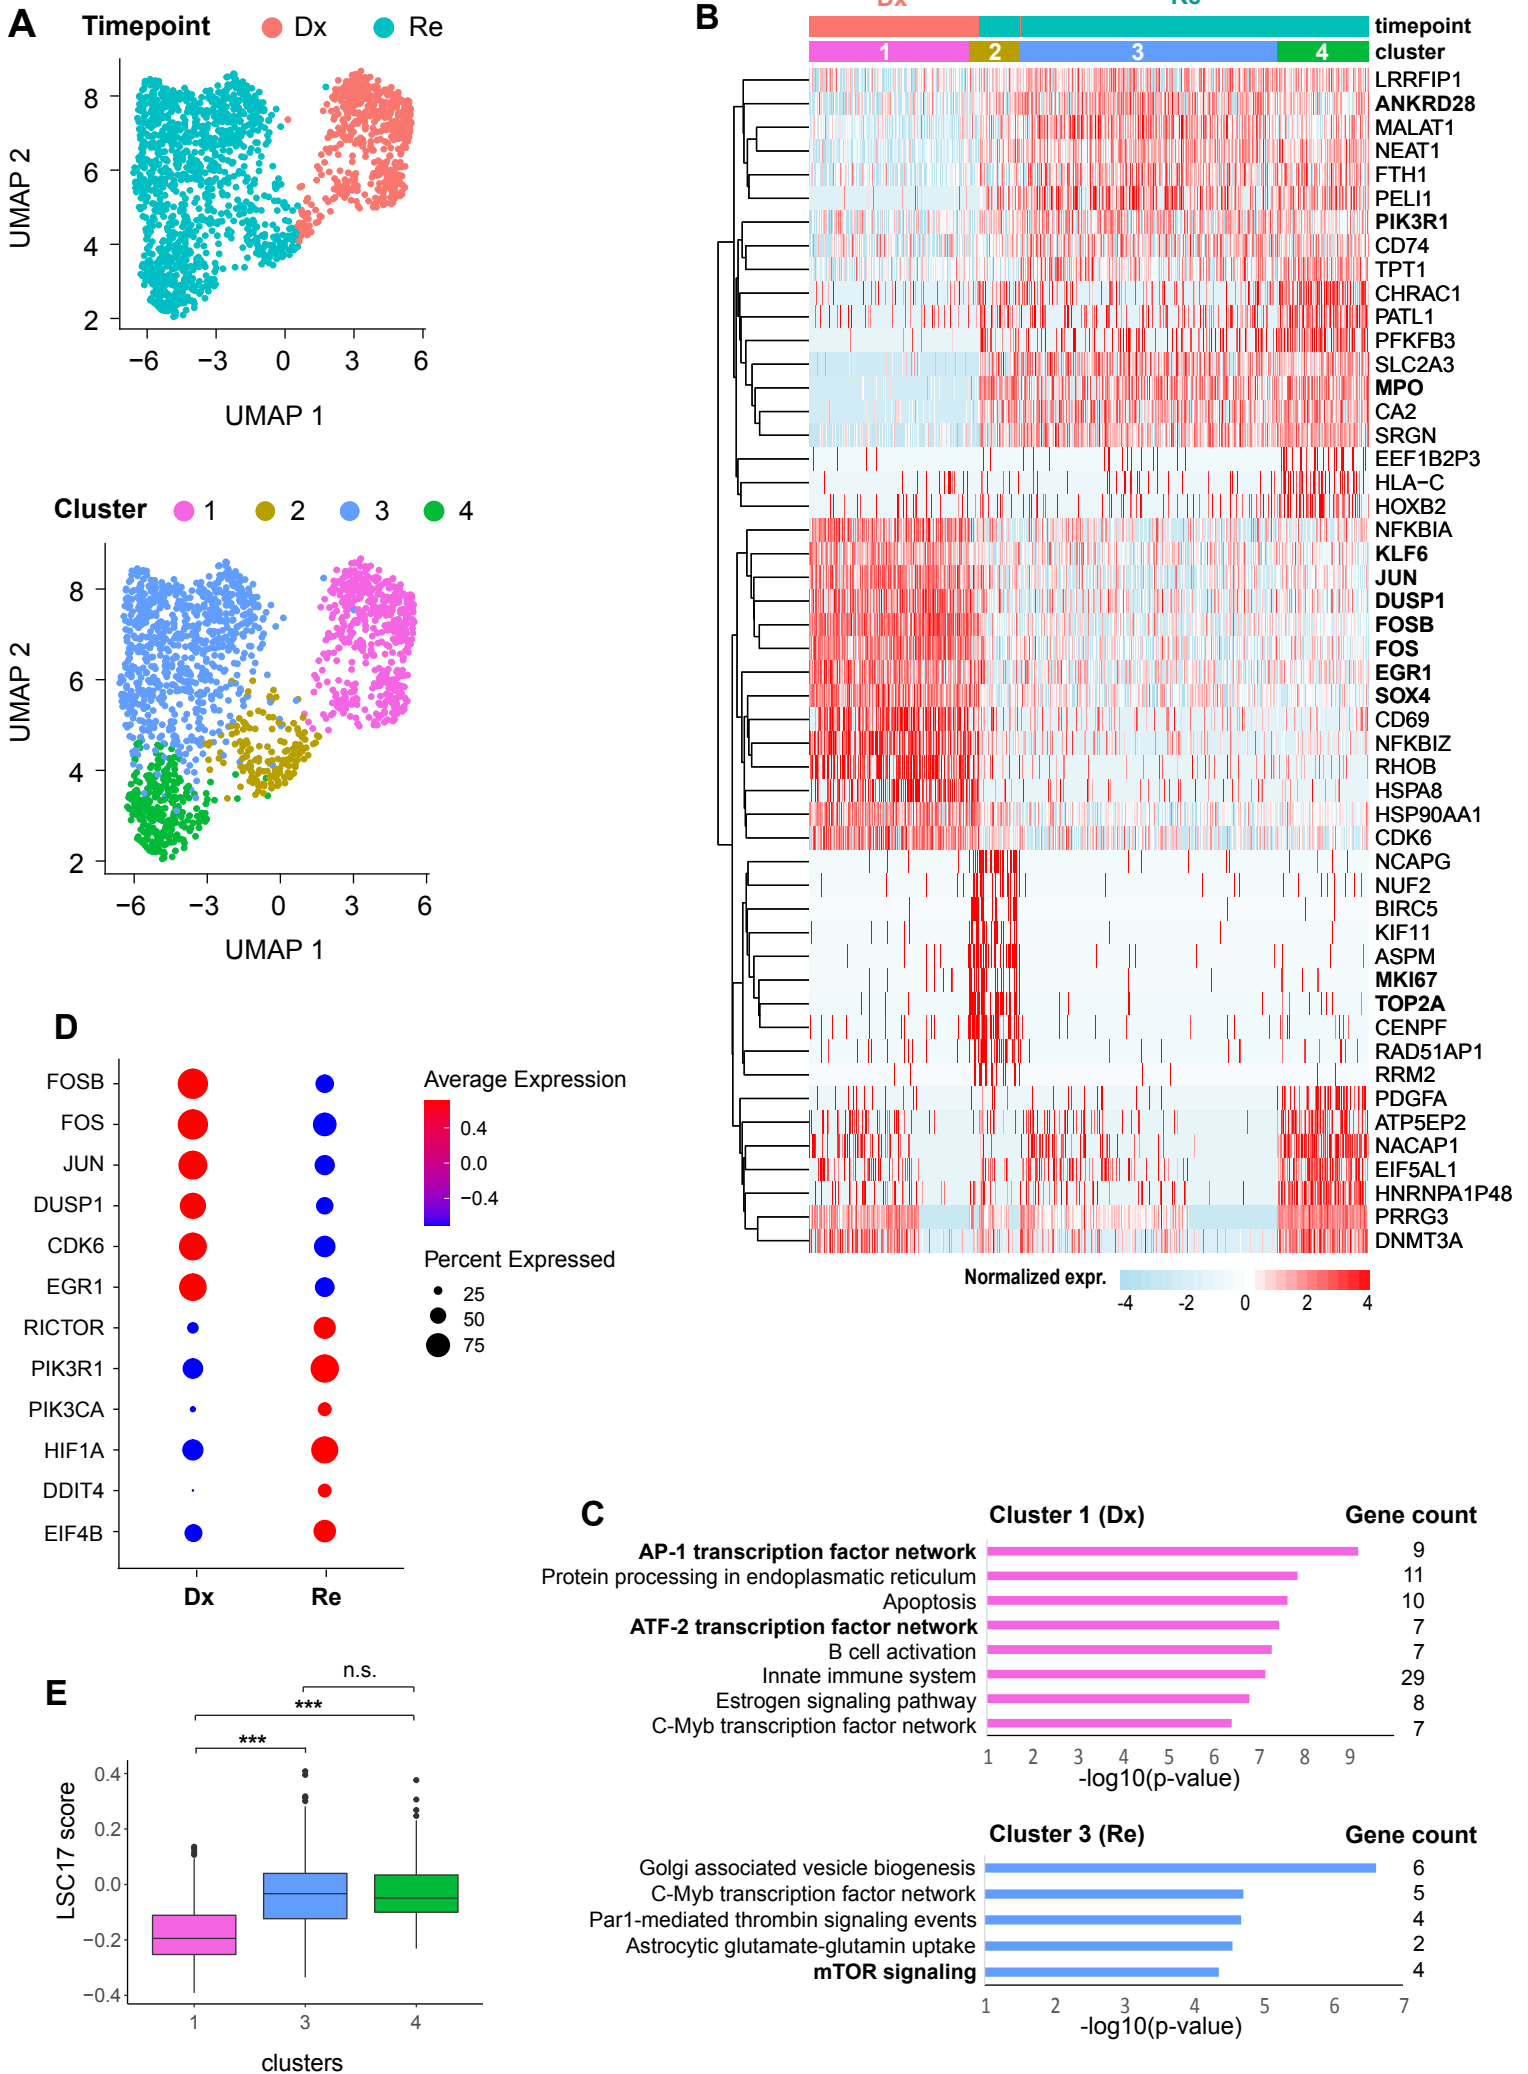

## Figure 5

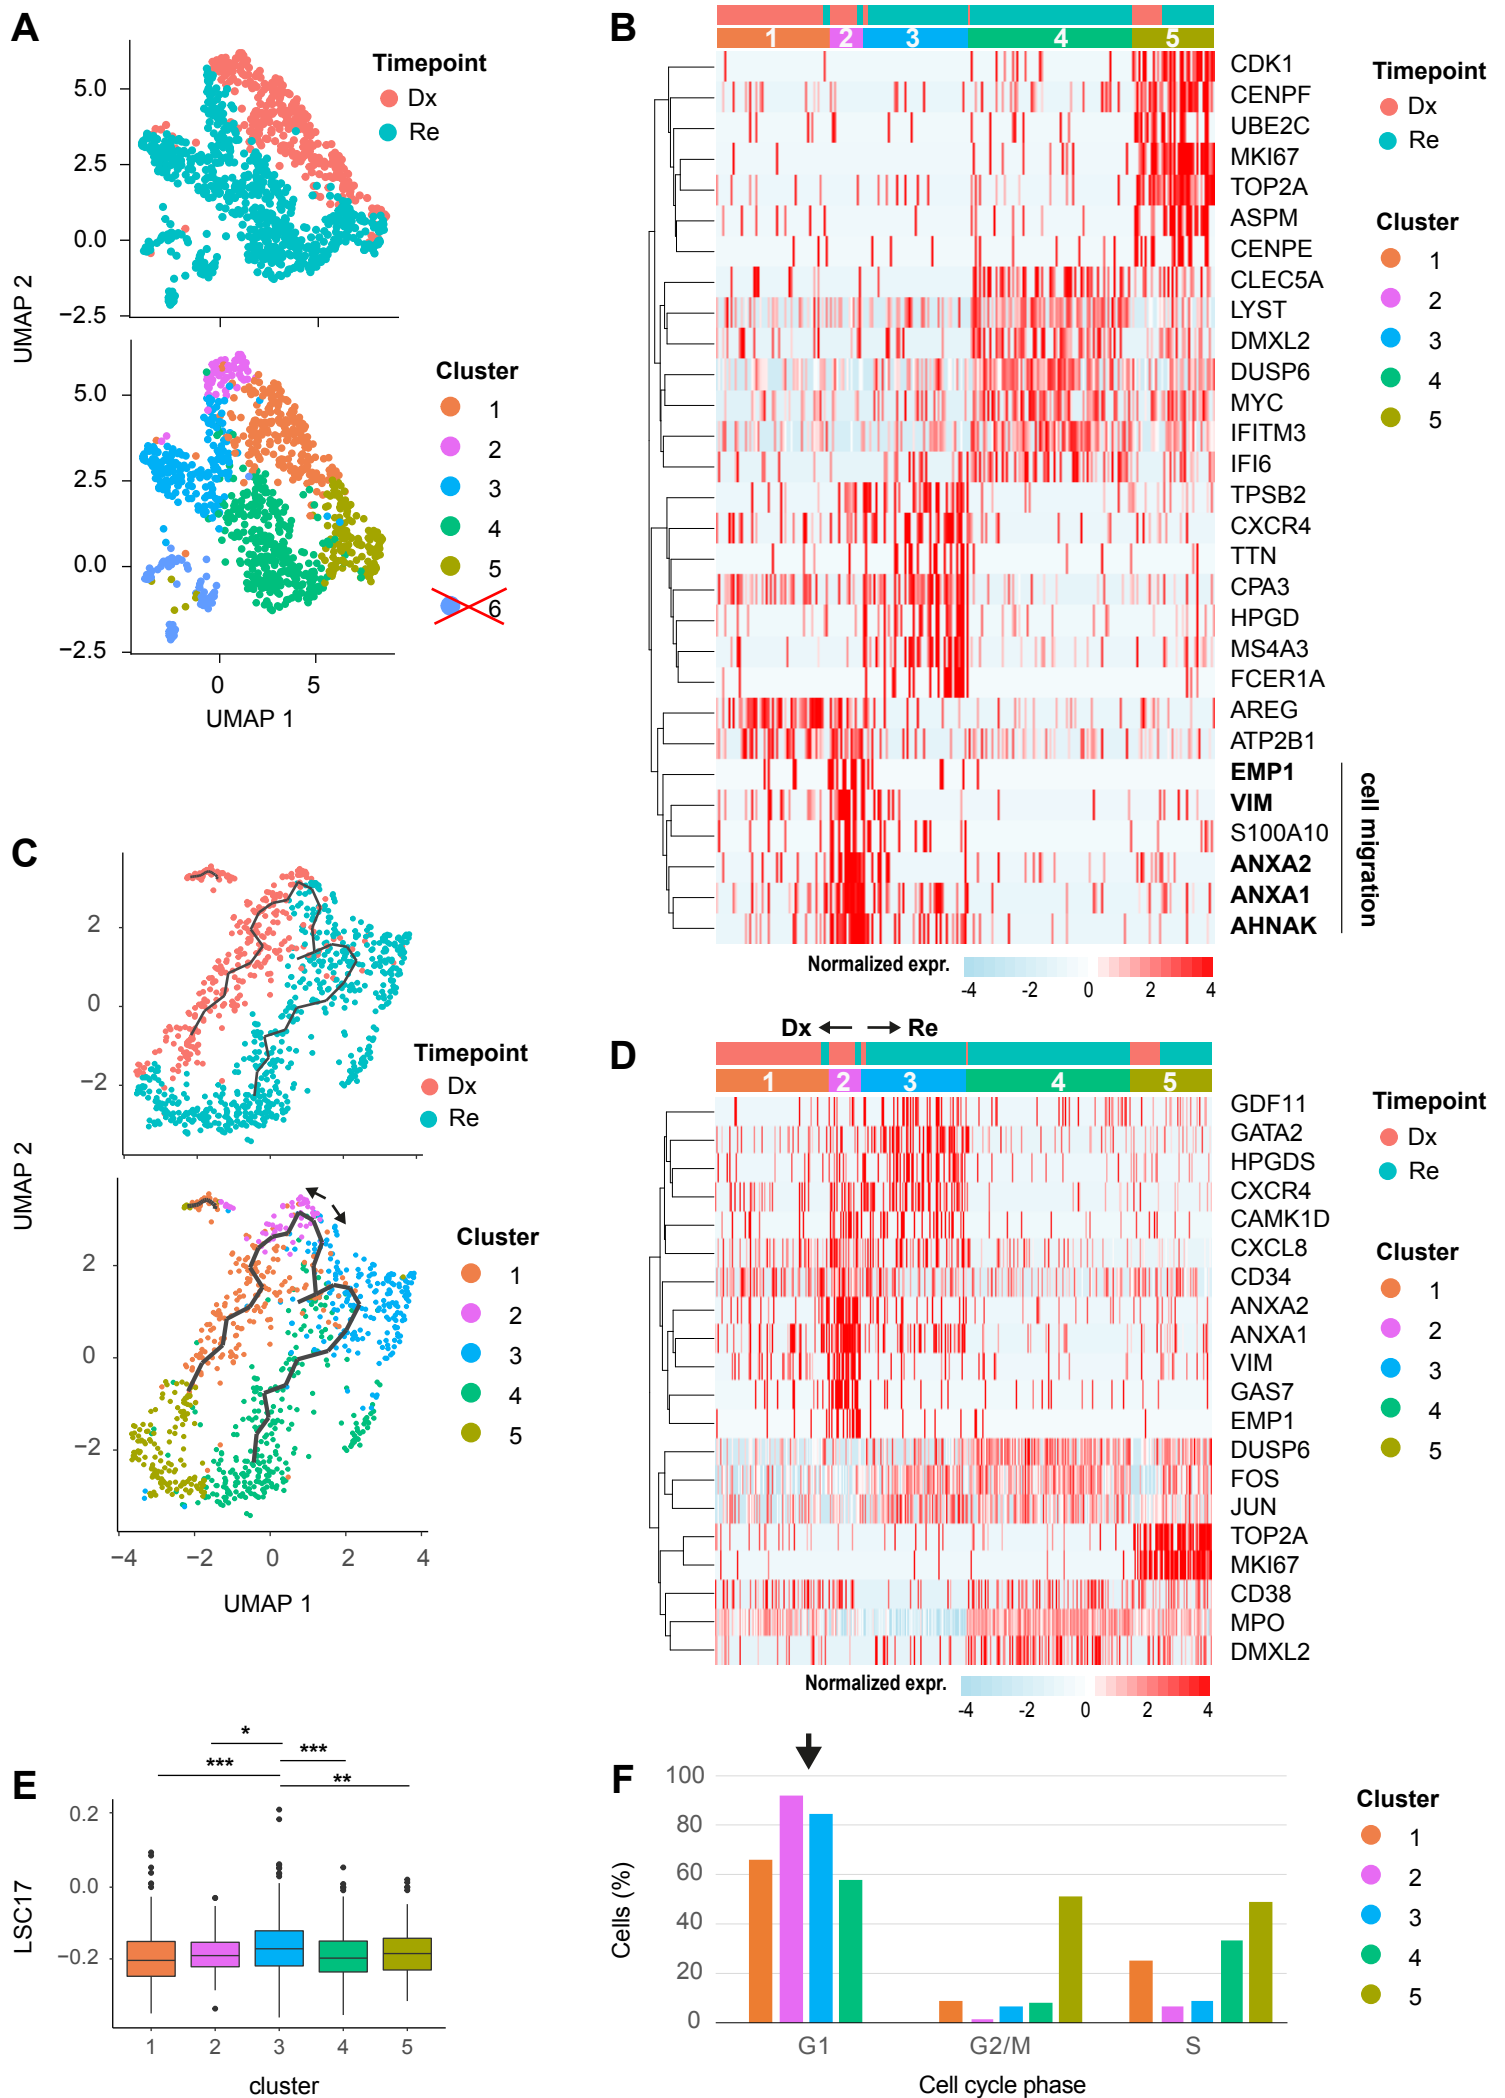

## Figure 6

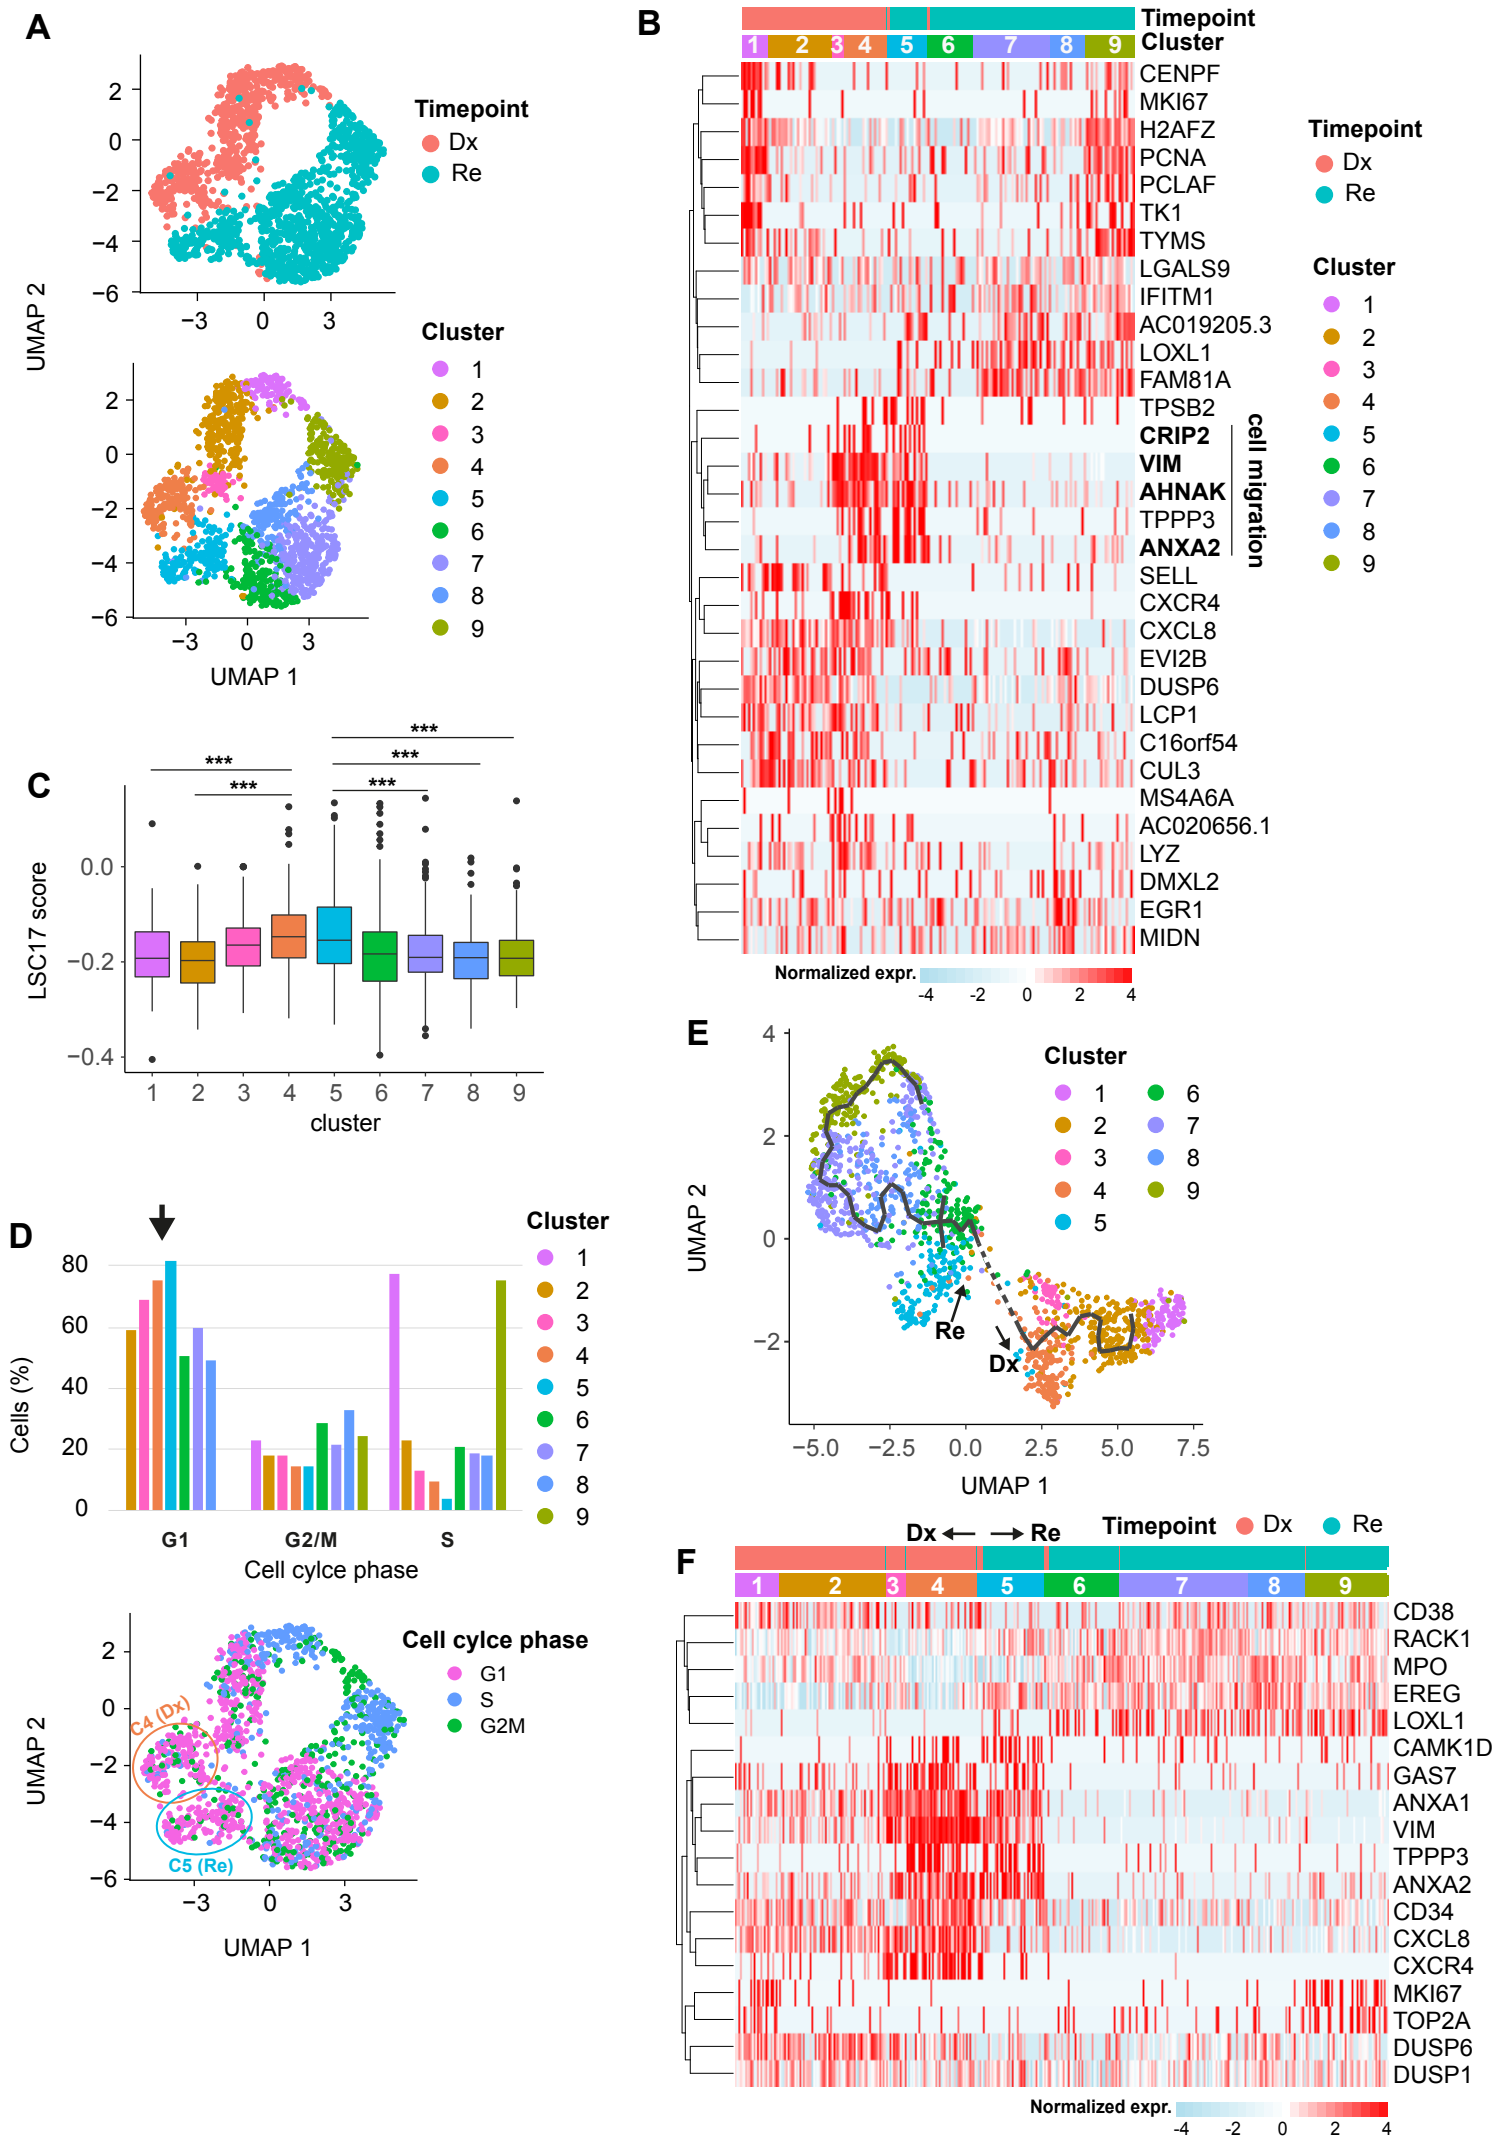

Source: https://www.biorxiv.org/content/10.1101/2022.01.04.474929v1.full.pdf
