# Supplementary material for: Longitudinal single-cell transcriptomics reveals distinct patterns of recurrence in acute myeloid leukemia
Source: bioRxiv or medRxiv preprint supplement (doi:10.1101/2022.01.04.474929), 2022-01-05
Supplement: Supplementary file [file media-1.pdf]

# 1 Longitudinal single-cell transcriptomics reveals distinct patterns of 2 resistance in acute myeloid leukemia

3 Yanan Zhai *et al.*

## 4 Supplemental Methods

### 5 AML samples

6 In total, 6 paired Dx-Re bone marrow aspirates from adult AML patients, aged between 31  
7 and 69 and diagnosed with *AML1-ETO* (n=2 low risk cases) or *FLT3-ITD* (n=1 intermediate  
8 and n=3 high risk) were analyzed from the AMLSG BiO Registry study (NTC 01252485). The  
9 phenotypic characterization (*AML1-ETO* and *FLT3-ITD*) was performed at the reference  
10 laboratory of the German and Austrian AML Study Group (AMLSG). All patients received  
11 intensive standard induction chemotherapy with cytarabine and an anthracycline (7+3  
12 regimen) followed by high-dose cytarabine consolidation cycles. Patient characteristics are  
13 summarized in **Supplementary Table S1**. Informed consent for both treatment and  
14 biobanking of leukemia samples according to the Declaration of Helsinki was given by all  
15 patients. Approval was obtained from the ethical review board of the University of Ulm  
16 (Ethikkommission der Universität Ulm).

### 17 Cell preparation

18 Bone marrow aspirates from AML patients were processed using density gradient  
19 centrifugation to isolate mononuclear cells, viably frozen in medium containing 10% DMSO  
20 and shipped with dry ice. Cryopreserved AML samples were thawed at 37°C. After washing  
21 with cold PBS, cells were resuspended in 500µl PBS with 0.2% human serum and incubated  
22 for 10 minutes on ice. After centrifugation and removing the supernatant, cells were  
23 resuspended in 200µl cold PBS with 20µl PE-conjugated CD33 and 20µl APC-conjugated  
24 CD34 (eBioscience). Cells were stained for 30 minutes on ice, washed with cold PBS with  
25 0.5% BSA and resuspended in 500µl PBS with 0.5% BSA and 1µl 7-AAD (eBioscience). After  
26 incubation for 10 minutes, CD33/CD34+ cells were sorted into 384-well plate (BioRad)  
27 containing well-specific primers (100nl, 0.75pmol/µl) and 5µl mineral oil (Sigma-Aldrich)  
28 on the BD FACS Aria cell sorter. After sorting plates were sealed and span down for 2  
29 minutes at 2000g, snap frozen on dry ice and stored at -80°C until use.

### 30 Single cell SORT-seq

31 We applied SORT-seq<sup>1</sup>, a method that integrates single cell FACS sorting (Fluorescence-  
32 Activated Cell Sorter) with the CEL-Seq2 protocol<sup>2</sup> to measure gene expression at single cell  
33 resolution. External RNA Controls Consortium (ERCC) transcripts were spiked-in to detect  
34 empty wells, low quality mRNA and failed reactions. The frozen plates were centrifuged at  
35 1400 RPM for 2 minutes at 4°C before processing. Processing of single cell plates included

36 first strand synthesis and barcoding in the 384 well plate. mRNA from the single cells were  
37 pooled and batch amplified by in vitro transcription (IVT) (Invitrogen # AM1334). Sequence  
38 libraries were prepared with Phusion High-Fidelity Polymerase (NEB).

### 39 **Bulk RNA-seq**

40 Total RNA was extracted using Quick-RNA Microprep Kit (Zymo Research) according to the  
41 manufacturer protocol with DNaseI treatment. The RNA concentration was quantified with  
42 Qubit Fluorometer (Invitrogen). RNA libraries were prepared with KAPA RNA HyperPrep Kit  
43 with RiboErase (HMR) kit (Roche) following the manufacturer's recommendations. RNA-  
44 seq libraries were paired-end sequenced on an Illumina Nextseq 500 at an average depth  
45 of ~30M reads.

### 46 **Detection of *FLT3*-ITD at diagnosis and relapse**

47 The presence of *FLT3*-ITD was detected by DNA-based PCR followed by capillary  
48 electrophoresis. The detailed procedures were described previously<sup>3</sup>.

### 49 **Data analysis**

#### 50 **Sequencing and mapping**

51 Single cell libraries were pair-end sequenced on an Illumina NextSeq500 at an average  
52 depth of ~30M reads per library and demultiplexed using bcl2fastq version 2.15.0.4 with  
53 default settings. We used STAR version 2.7.2b<sup>4</sup> to map the 42nt long read1 to human  
54 reference genome hg38. Next, we used UMI-tools<sup>5</sup> to reconstruct the gene by cell UMI  
55 count matrix from the BAM file.

#### 56 **Normalization, dimensionality reduction and cluster analysis**

57 We used the Seurat v3<sup>6</sup> R-package for downstream analysis. First, low quality cells (genes  
58 detected < 500 or UMI count > 12,000 or mitochondrial UMIs > 30% or ERCC reads > 20%)  
59 were discarded (**Supplementary Fig. 1A**). Ribosomal and mitochondrial genes were also  
60 discarded prior to normalization. Cells from all libraries were concatenated and log<sub>2</sub>  
61 normalized. Next, we applied principal component analysis (PCA) on the 2,000 most  
62 variable genes to reduce the dimensionality of the dataset and retained the 50 components  
63 for cluster analysis and the identification of marker genes. Cluster analysis was run using  
64 the Louvain algorithm. Cluster markers were identified using the Seurat function  
65 *FindAllMarkers* with parameters *min.pct*=0.25, *logfc.threshold*=0.5 and *only.pos*=FALSE.  
66 Marker genes discriminating two clusters or Dx from Re cells were obtained using the  
67 Seurat function *FindMarkers* with parameters *min.pct*=0.25, *logfc.threshold*=0.5,  
68 *min.diff.pct*=0.2 and *only.pos*=FALSE. All marker genes with adjusted p-value > 0.01 were  
69 discarded.

#### 70 **Whole exome sequencing analysis**

71 We used the GATK toolkit version v4.2.0<sup>7</sup> to detect short somatic variants following the  
72 GATK best practices workflows “Data pre-processing for variant discovery” and “Somatic  
73 short variant discovery (SNVs + Indels)” with small modifications. Briefly, paired-end reads  
74 were aligned using BWA version 2.2.1<sup>8</sup>, discarding reads with MAPQ < 20. PCR duplicates  
75 were marked using Sambamba 0.8.0 *markdup*<sup>9</sup> and base quality scores were recalibrated  
76 using the GATK functions *BaseRecalibrator* and *ApplyBQSR*. Variants were called using the  
77 *panel of normals* (PON) and *gnomAD* VCF file provided in the GATK resource bundle in two  
78 modes: Dx and Re as tumor samples and Cr as a germline control, or all three samples as  
79 tumor only. The rationale for this approach is that variants present (at low frequency) in  
80 the Cr sample (due to minimal residual disease) are sometimes discarded as germline.  
81 Variants were filtered with *FilterMutectCalls* and annotated with the Ensembl Variant  
82 Effect Predictor (VEP) version 104<sup>10</sup>.

83 Variants were discarded when ANY of the following conditions were satisfied:

- 84 - The variant FILTER status was unequal to “PASS” or “slippage.”
- 85 - The variant had less than 5 reads on the alternative allele (AD < 5) in the Dx, Re and  
86 Cr samples;
- 87 - The variant allele frequency was below 0.05 (VAF < 0.05) in the Dx, Re and Cr  
88 samples;
- 89 - The variant had a gnomAD allele frequency  $\geq 1.0 \times 10^{-3}$ ;
- 90 - The variant allele frequency did not change significantly between Dx vs CR or Re vs  
91 CR (p-adjusted  $\geq 0.01$ ; Fisher’s exact test)
- 92 - The variant allele frequency at Cr exceeded 0.2 (VAF<sub>CR</sub> > 0.2)

93 Mutations were visualized using the *mafTools* R-package<sup>12</sup> and listed in supplemental  
94 table 2.

## 95 References

- 96 1. Muraro MJ, Dharmadhikari G, Grün D, et al. A Single-Cell Transcriptome Atlas of the  
97 Human Pancreas. *Cell Syst.* 2016;3(4):385-394.e3. doi:10.1016/j.cels.2016.09.002
- 98 2. Hashimshony T, Senderovich N, Avital G, et al. CEL-Seq2: Sensitive highly-multiplexed  
99 single-cell RNA-Seq. *Genome Biol.* 2016;17(1):1-7. doi:10.1186/s13059-016-0938-8
- 100 3. Schmalbrock LK, Dolnik A, Cocciardi S, et al. Clonal evolution of acute myeloid leukemia  
101 with FLT3-ITD mutation under treatment with midostaurin. *Blood.* 2021;137(22):3093-  
102 3104. doi:10.1182/blood.2020007626
- 103 4. Dobin A, Davis CA, Schlesinger F, et al. STAR: Ultrafast universal RNA-seq aligner.  
104 *Bioinformatics.* 2013;29(1):15-21. doi:10.1093/bioinformatics/bts635
- 105 5. Smith T, Heger A, Sudbery I. UMI-tools: modeling sequencing errors in Unique  
106 Molecular Identifiers to improve quantification accuracy. *Genome Res.* 2017;27(3):491-  
107 499. doi:10.1101/GR.209601.116

108 6. Stuart T, Butler A, Hoffman P, et al. Comprehensive Integration of Single-Cell Data. *Cell*.  
109 2019;177(7):1888-1902. doi:10.1016/j.cell.2019.05.031

110 7. Genomics in the Cloud: Using Docker, GATK, and WDL in Terra - Geraldine A. Van der  
111 Auwera, Brian D. O'Connor - Google Boeken.

112 8. Md V, Misra S, Li H, Aluru S. Efficient architecture-aware acceleration of BWA-MEM for  
113 multicore systems. *Proc - 2019 IEEE 33rd Int Parallel Distrib Process Symp IPDPS 2019*.  
114 Published online May 2019:314-324. doi:10.1109/IPDPS.2019.00041

115 9. Tarasov A, Vilella AJ, Cuppen E, Nijman IJ, Prins P. Sambamba: fast processing of NGS  
116 alignment formats. *Bioinformatics*. 2015;31(12):2032-2034.  
117 doi:10.1093/BIOINFORMATICS/BTV098

118 10. McLaren W, Gil L, Hunt SE, et al. The Ensembl Variant Effect Predictor. *Genome Biol*.  
119 2016;17(1). doi:10.1186/S13059-016-0974-4

120 11. Benjamini Y, Hochberg Y. Controlling the False Discovery Rate: A Practical and Powerful  
121 Approach to Multiple Testing. *J R Stat Soc Ser B*. 1995;57(1):289-300.  
122 doi:10.1111/j.2517-6161.1995.tb02031.x

123 12. Mayakonda A, Lin D-C, Assenov Y, Plass C, Koeffler HP. Maftools: efficient and  
124 comprehensive analysis of somatic variants in cancer. *Genome Res*. 2018;28(11):1747-  
125 1756. doi:10.1101/GR.239244.118

126

## 127 **Supplemental Figure Legends**

128 **Supplemental Figure 1. Quality Control of single cell data.** (A) Violin plots depicting the  
129 detected number of genes (top) and unique transcripts (bottom) per cell. (B) Venn diagram  
130 showing the number of DEGs between the Dx and Re sample, for a pairwise comparison in  
131 the four *FLT3*-ITD patients. Very few DEGs are shared between patients. (C) Same as (B), for  
132 the two *AML1-ETO* patients.

133 **Supplemental Figure 2. Single cell landscape of *FLT3*-ITD patient s232.** (A) UMAP of Dx and Re cells for *FLT3*-ITD patient s232 colored by timepoint (top) or cell  
134 cluster (bottom). (B) Heatmap displaying the top 20 cluster marker genes. Color represents  
135 row normalized expression values. (C) Overrepresented GO terms (category: biological  
136 pathway) in cluster 1 (Dx) and 3 (Re). P-values: hypergeometric test (BH-corrected). (D) Gene  
137 expression of selected mTORC1 pathway members.  
138

139 **Supplemental Figure 3. Single cell landscape of *FLT3*-ITD patient s292.** (A) UMAP of Dx and  
140 Re cells for *FLT3*-ITD patient s292 colored by timepoint (top) or cell cluster (bottom). (B)  
141 Heatmap displaying the top 20 cluster marker genes. Color represents row normalized  
142 expression values. (C) overrepresented GO terms (category: biological pathway) per cluster.

143 **Supplemental Figure 4. Single cell landscape of *FLT3*-ITD patient s2275.** (A) UMAP of Dx and  
144 Re cells for *FLT3*-ITD patient s2275 colored by timepoint (top) or cell cluster (bottom). (B)  
145 Heatmap displaying the top 20 cluster marker genes. Color represents row normalized  
146 expression values. (C) overrepresented GO terms (category: biological pathway) for clusters  
147 1 (Dx) and 5 (Re).

148 **Supplemental Figure 5. Relapse cells of *FLT3*-ITD patient s3432 are associated with  
149 exocytosis.** (A) Gene expression of selected RAS-pathway members. (B) overrepresented GO  
150 terms (category: biological pathway) for clusters 4. (C) Selected genes associated with  
151 exocytosis. Color depicts relative expression; size depicts the relative number of cells for a  
152 which at least one transcript was detected. \*\*  $p < 0.01$ , \*\*\*  $p < 0.001$ , Wilcox rank sum /  
153 Mann-Whitney U test.

154 **Supplemental Figure 6.** Cells in cluster 6 (blue circle, s914 *AML1-ETO*) simultaneously express  
155 hematopoietic stem-/progenitor- (*CD34*), monocyte (*LYZ*), B-cell (*MS4A1*), erythrocyte (*HBB*)  
156 and cell cycle (*TOP2A*, *MKI67*) marker genes. This indicates that these cells are doublets or  
157 contaminated by ambient RNA and were discarded from further analysis. Color bar represents  
158 the expression level of corresponding genes.

159 **Supplemental Figure 7. Single cell landscape of *AML1-ETO* patient s220.** (A) Heatmap  
160 displaying the top 20 cluster marker genes. Color represents row normalized expression  
161 values. Marker genes shared between cluster 4 (Dx) and 5 (Re) are highlighted inside a black  
162 rectangle. (B) overrepresented GO terms (category: biological pathway) at Dx and Re.

163 **Supplemental Table Legends**

164 **Supplemental Table1.** Clinical information and sequencing details of the patients

165 **Supplemental Table2.** Dynamic changes of mutations between Dx and Re (WES) and  
166 detected fusion genes from bulk RNA-Seq. Please see the individual Excel table.

167 **Supplemental Table3.** Characterization of *FLT3*-ITD at diagnosis and relapse.

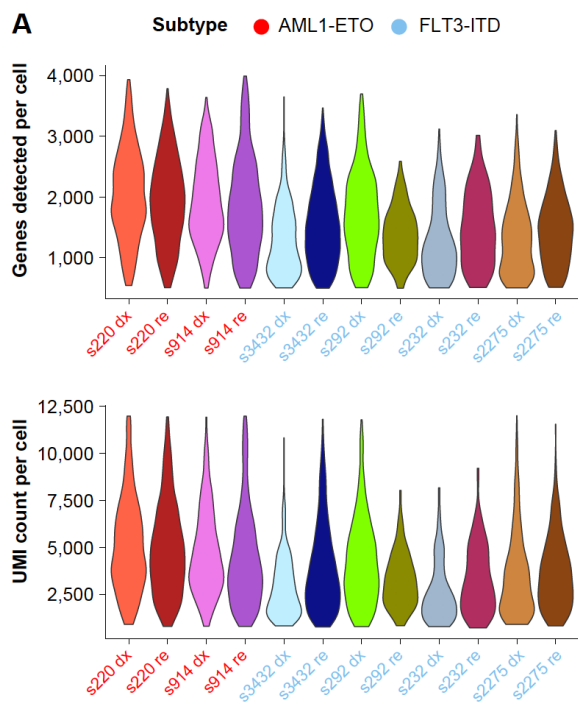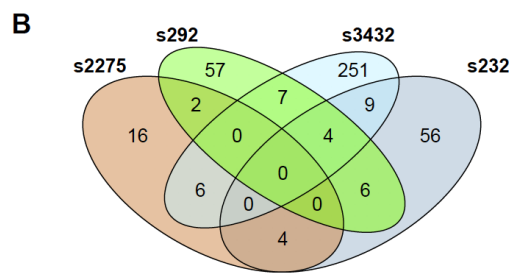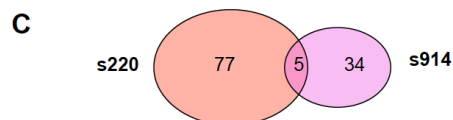

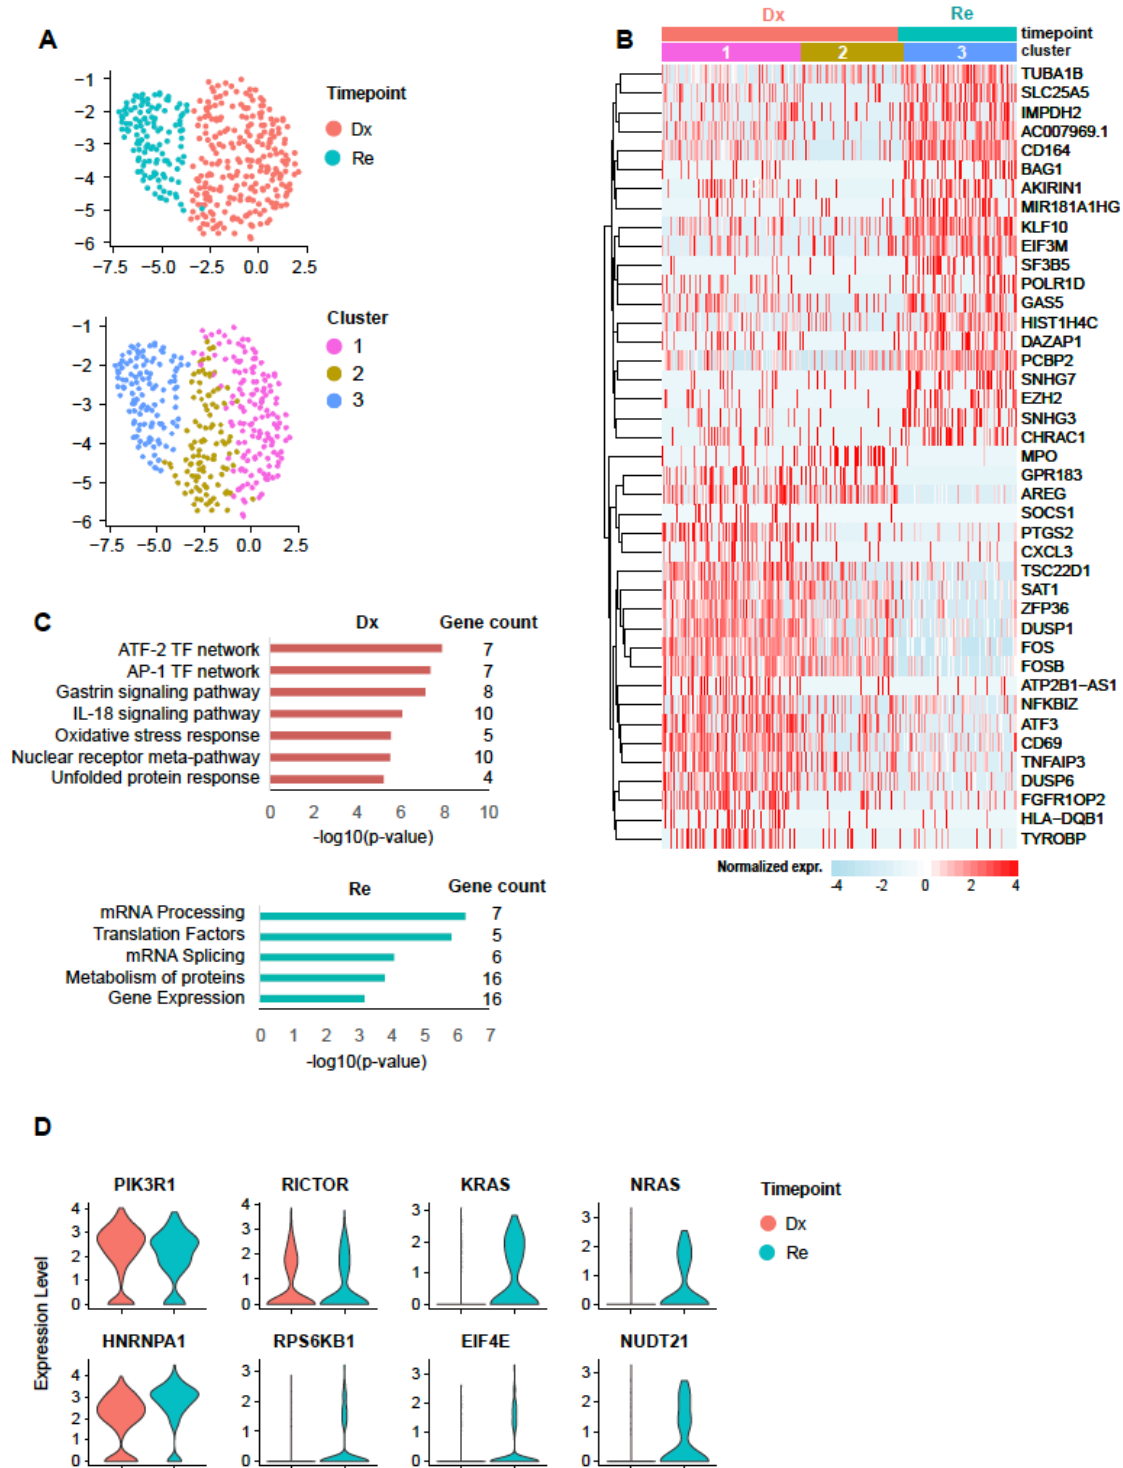

171

172



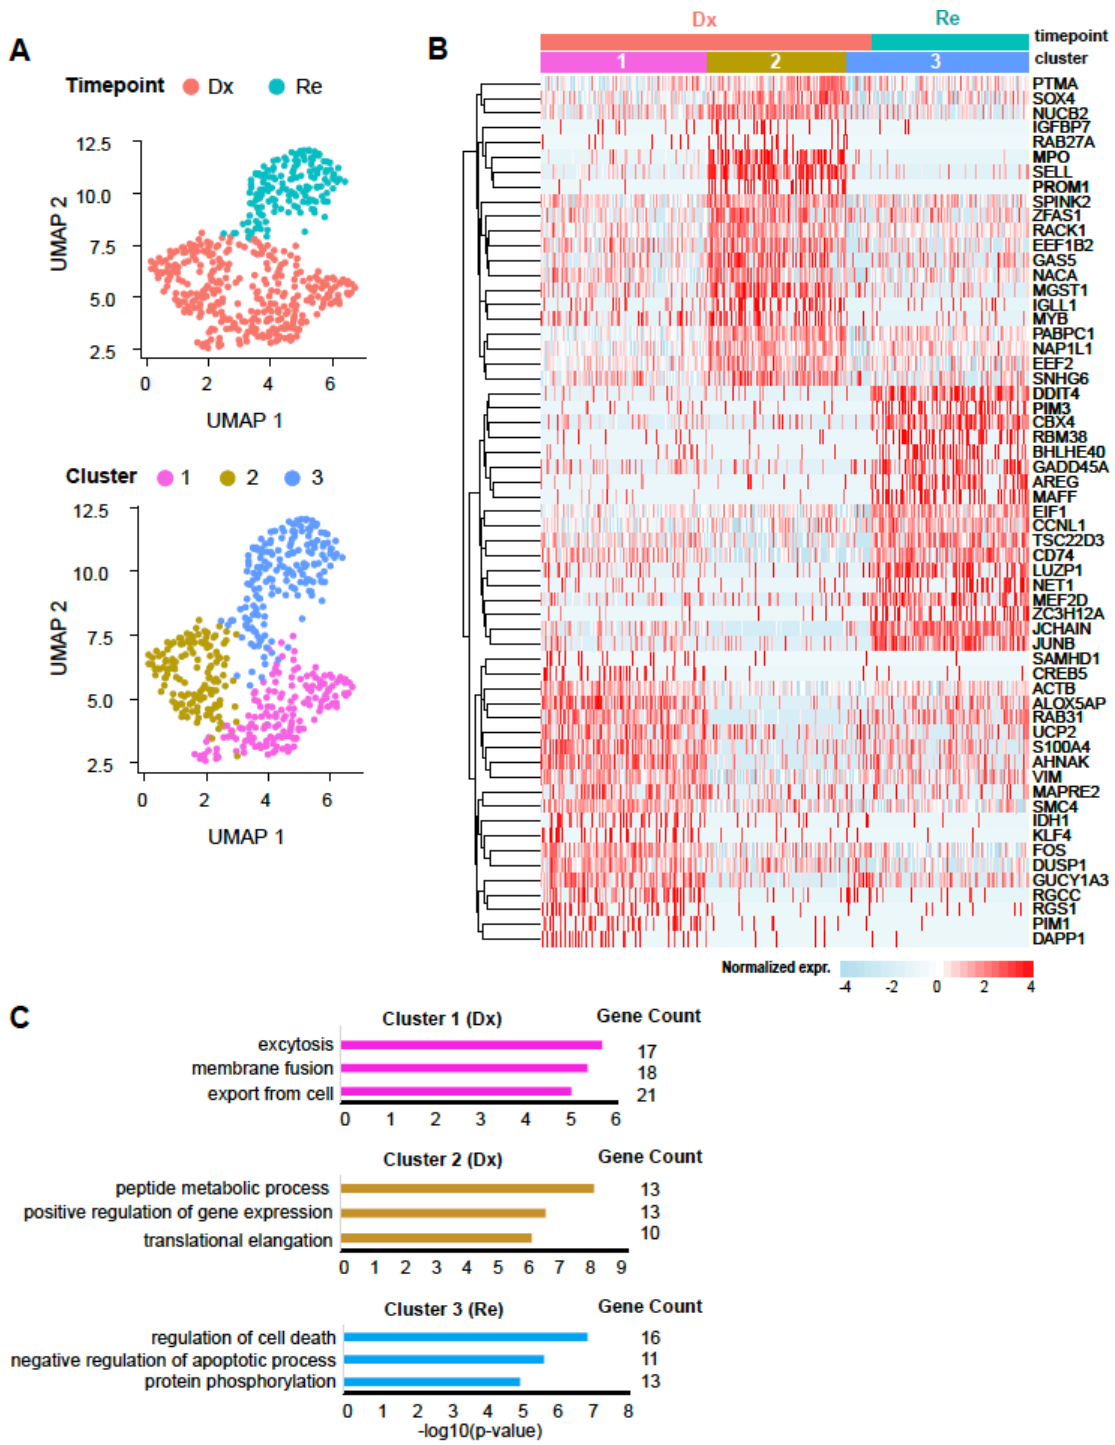

174

175

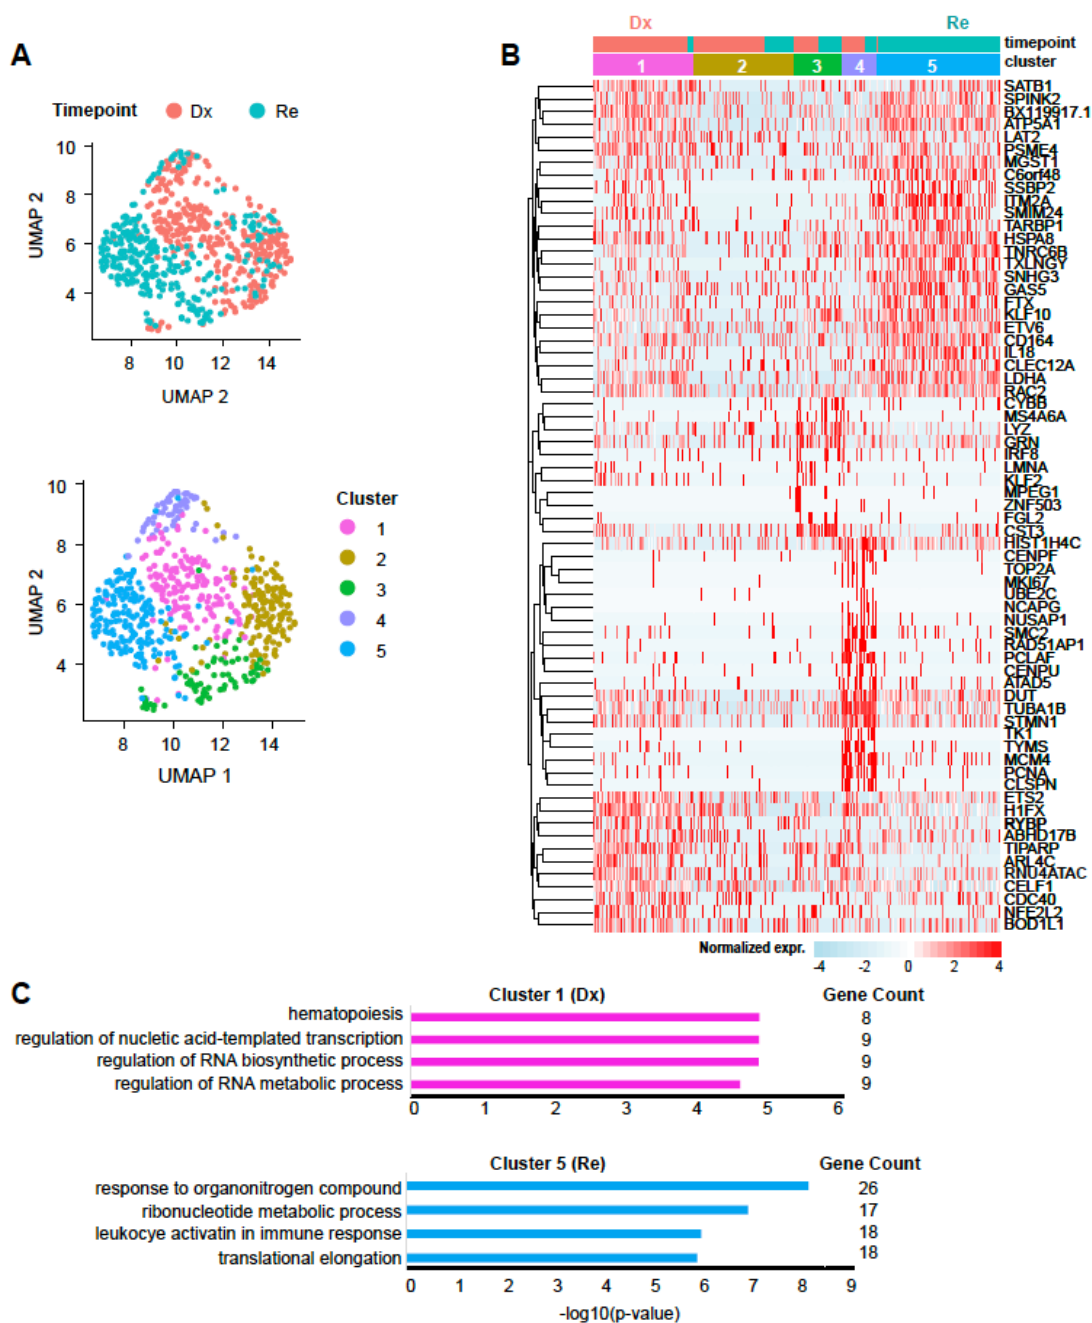

178 Supplemental Figure 5 (s3432).

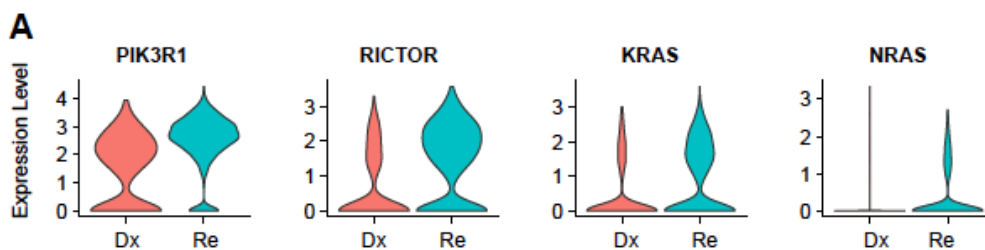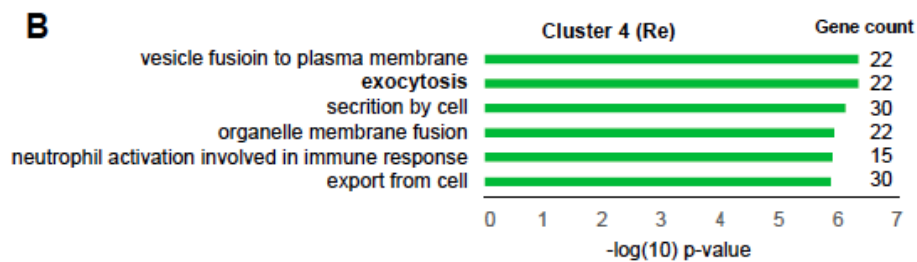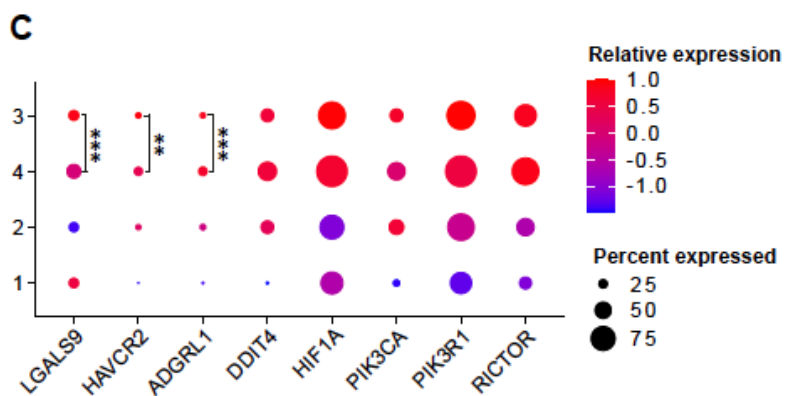

179

180

181 **Supplemental Figure 6 (s914).**

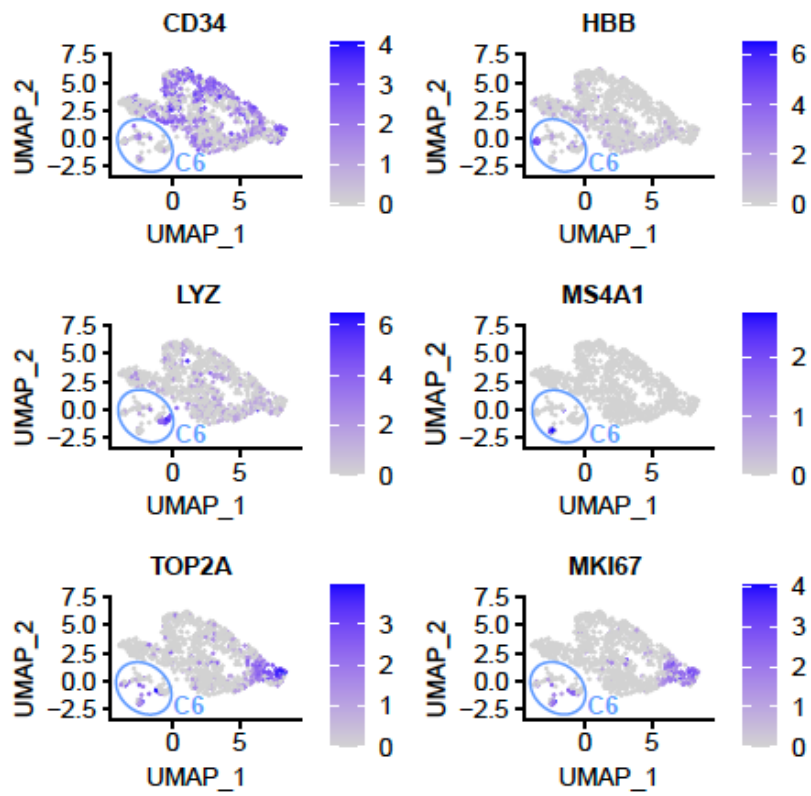

182

183

184 Supplemental Figure 7 (s220).

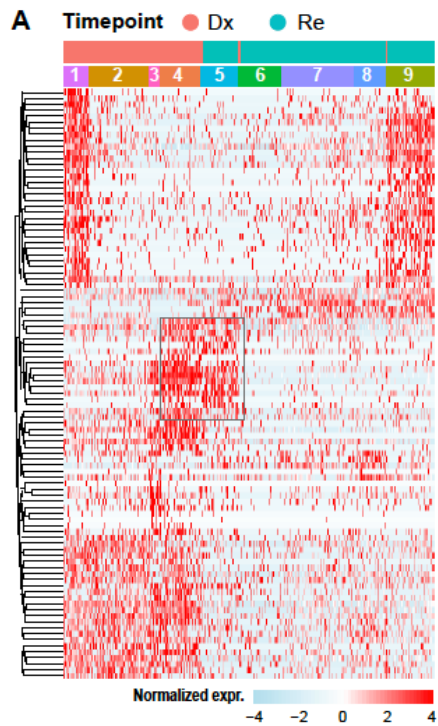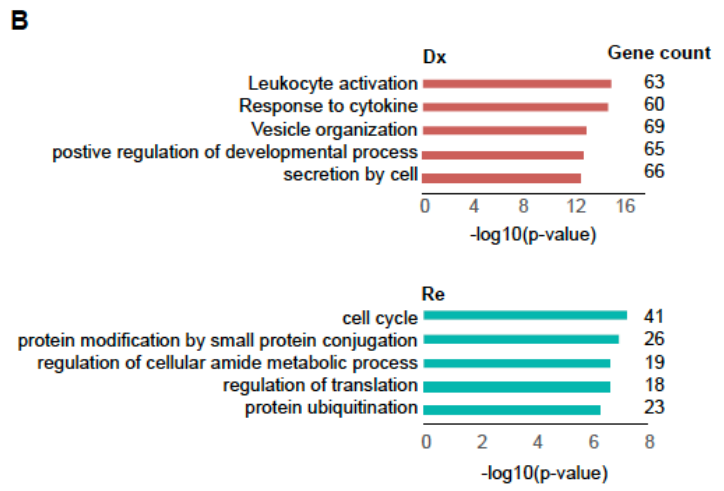

185

186

187 **Supplemental Tables**

188 **Supplemental Table1.** Clinical information and sequencing details of the patients

| Patient ID            | Gender | Age | Sample Source |    | Blast% |     | Enrichment |      |
|-----------------------|--------|-----|---------------|----|--------|-----|------------|------|
|                       |        |     | Dx            | Re | Dx     | Re  | Dx         | Re   |
| s220 <i>AET1-ETO</i>  | Male   | 57  | BM            | BM | 90%    | NA  | CD34       | CD34 |
| s914 <i>AML1-ETO</i>  | Male   | 31  | BM            | BM | 30%    | NA  | CD34       | CD34 |
| s232 <i>FLT3-ITD</i>  | Male   | 53  | BM            | BM | 80%    | 90% | CD34       | CD34 |
| s292 <i>FLT3-ITD</i>  | Male   | 50  | BM            | BM | 90%    | 60% | CD34       | CD34 |
| s2275 <i>FLT3-ITD</i> | Male   | 33  | BM            | BM | 95%    | 95% | CD34       | CD34 |
| s3432 <i>FLT3-ITD</i> | Female | 66  | BM            | BM | 95%    | 91% | CD33       | CD34 |

189

| Patient ID            | Cell number after QC |       | Counts per cell (Mean) |       | Features per cell (Mean) |       |
|-----------------------|----------------------|-------|------------------------|-------|--------------------------|-------|
|                       | DX                   | Re    | DX                     | Re    | DX                       | Re    |
| s220 <i>AML1-ETO</i>  | 576                  | 929   | 5 112                  | 4 856 | 2 042                    | 1 939 |
| s914 <i>AML1-ETO</i>  | 314                  | 688   | 4 713                  | 4 411 | 1 951                    | 1 851 |
| s232 <i>FLT3-ITD</i>  | 249                  | 123   | 2 653                  | 3 289 | 1 278                    | 1 497 |
| s292 <i>FLT3-ITD</i>  | 324                  | 152   | 4 224                  | 3 261 | 1 726                    | 1 380 |
| s2275 <i>FLT3-ITD</i> | 309                  | 281   | 3 530                  | 3 681 | 1 328                    | 1 457 |
| s3432 <i>FLT3-ITD</i> | 509                  | 1 158 | 2 895                  | 3 956 | 1 299                    | 1 563 |

190 BM: Bone Marrow; NA: not available

191 **Supplemental Table3.** Characterization of *FLT3-ITD* at diagnosis and relapse.

| Patient ID | Time point | FLT3-ITD allelic ratio | ITD same Dx/Rel 1=yes, 0=no | ITD loss (=FLT3-ITD negative at rel) 1=yes, 0=no | ITD change at rel 1=yes, 0=no | switch (insertion site, length) 1=yes, 0=no | loss of min 1 clone at rel 1=yes, 0=no | gain of min 1 clone at rel 1=yes, 0=no |
|------------|------------|------------------------|-----------------------------|--------------------------------------------------|-------------------------------|---------------------------------------------|----------------------------------------|----------------------------------------|
| s232       | Dx         | 0,398                  |                             |                                                  |                               |                                             |                                        |                                        |
|            | Re         | 0,744                  | 0                           | 0                                                | 1                             | 0                                           | 1                                      | 0                                      |
| s292       | Dx         | 0,659                  |                             |                                                  |                               |                                             |                                        |                                        |
|            | Re         | 0,71                   | 0                           | 0                                                | 1                             | 1                                           | 0                                      | 0                                      |
| s2275      | Dx         | 0,988                  |                             |                                                  |                               |                                             |                                        |                                        |
|            | Re         | 26,312                 | 0                           | 0                                                | 1                             | 1                                           | 0                                      | 0                                      |
| s3432      | Dx         | 0,617                  |                             |                                                  |                               |                                             |                                        |                                        |
|            | Re         | 0,325                  | 1                           | 0                                                | 0                             | 0                                           | 0                                      | 0                                      |

192
